# Supplementary material for: Synthesis and the absolute configuration of both enantiomers of 4,5-dihydroxy-3-(formyl)cyclopent-2-enone acetonide as a new chiral building block for prostanoid synthesis
Source: Royal Society of Chemistry journal article supplement (doi:10.1039/c4ob01535e), 2014-10-30
Supplement: c4ob01535e1.pdf [file c4ob01535e1.pdf]

## SUPPORTING INFORMATION

### Synthesis and Absolute Configuration of Both Enantiomers of 4,5-Dihydroxy-3-(formyl)cyclopent-2-enone Acetonide as a New Chiral Building Block for Prostanoid Synthesis

Beata Łukasik, Marian Mikołajczyk, Grzegorz Bujacz, and Remigiusz Żurawiński\*

#### Table of Contents

|                                                                                                               |    |
|---------------------------------------------------------------------------------------------------------------|----|
| 1. $^1\text{H}$ , $^{13}\text{C}$ and $^{31}\text{P}$ NMR spectra of compounds <b>5</b> and <b>7-13</b> ..... | 2  |
| 2. Energies, thermodynamic properties and geometries of conformers <b>5a-d</b> .....                          | 22 |
| 3. Single-point energies of conformers <b>5a-d</b> .....                                                      | 30 |

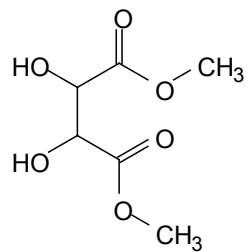

7

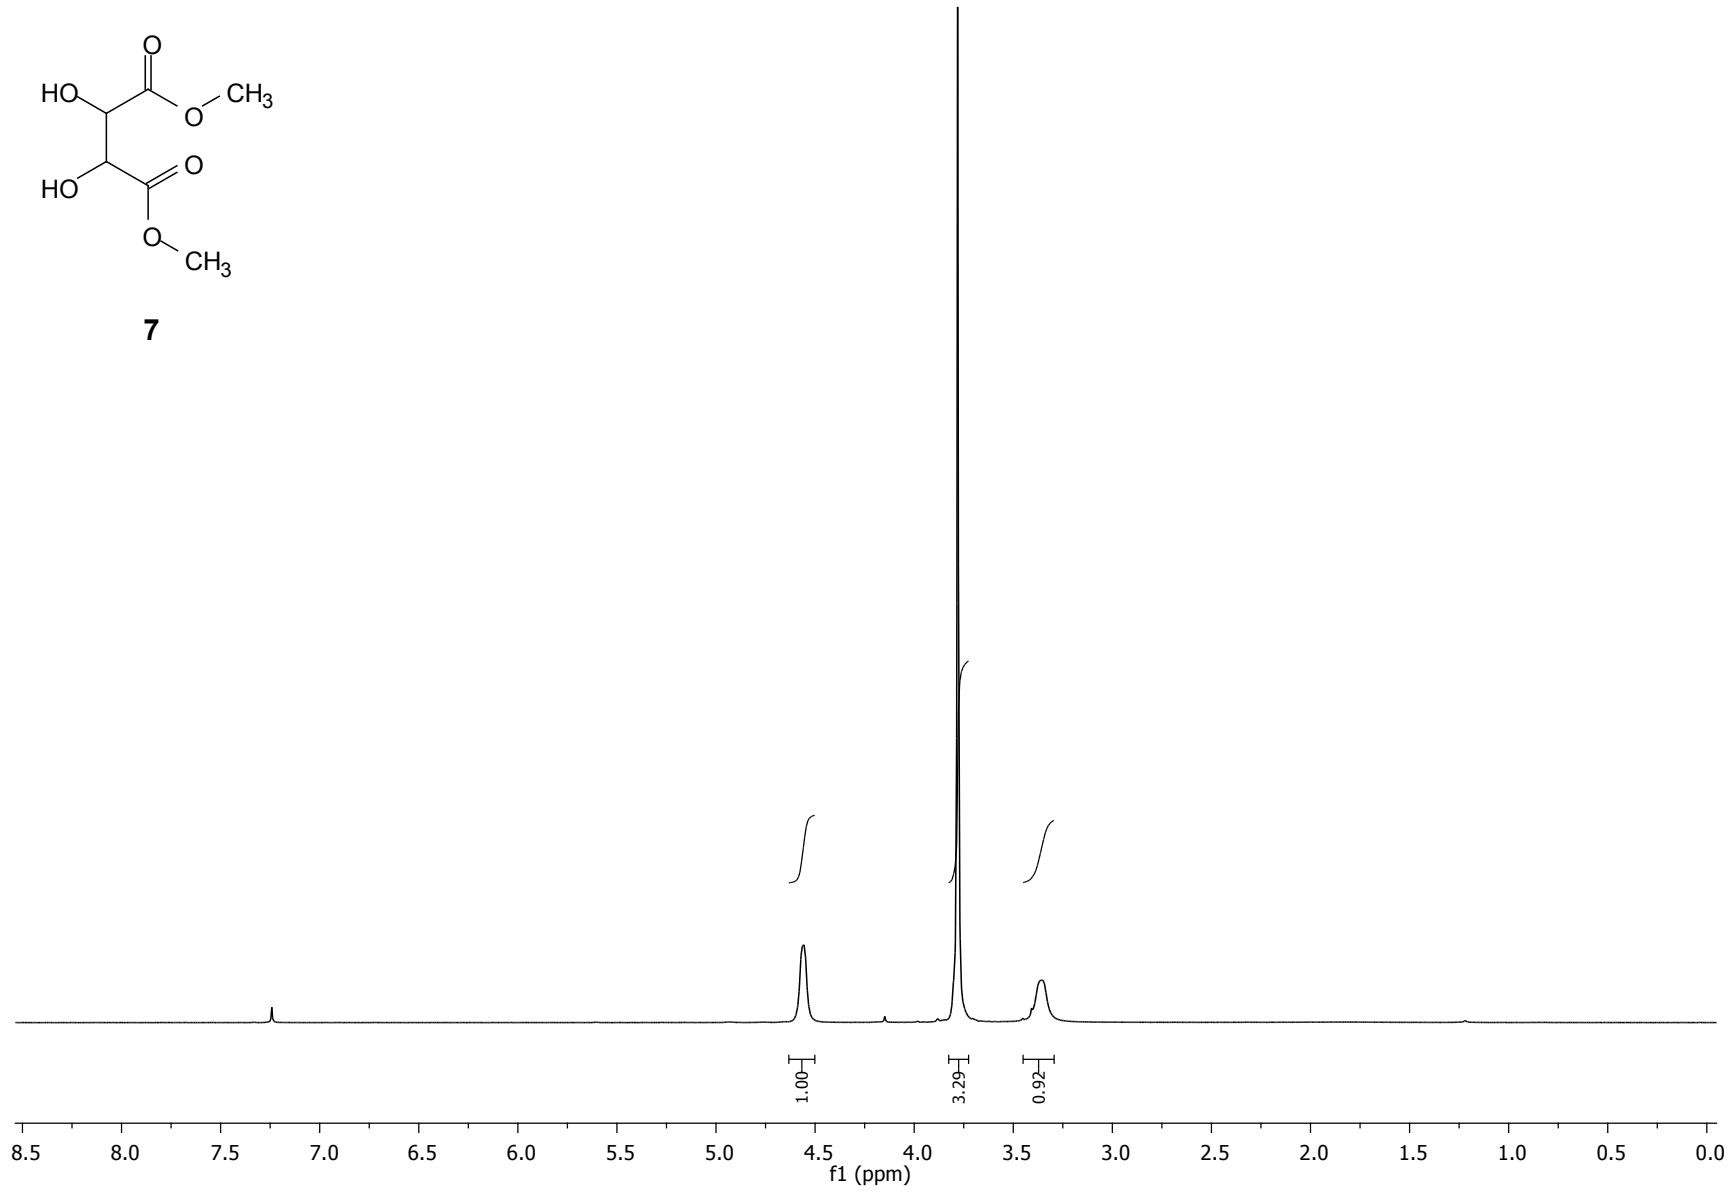

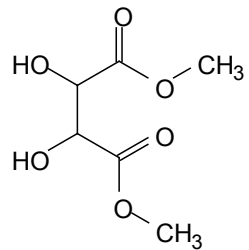

7

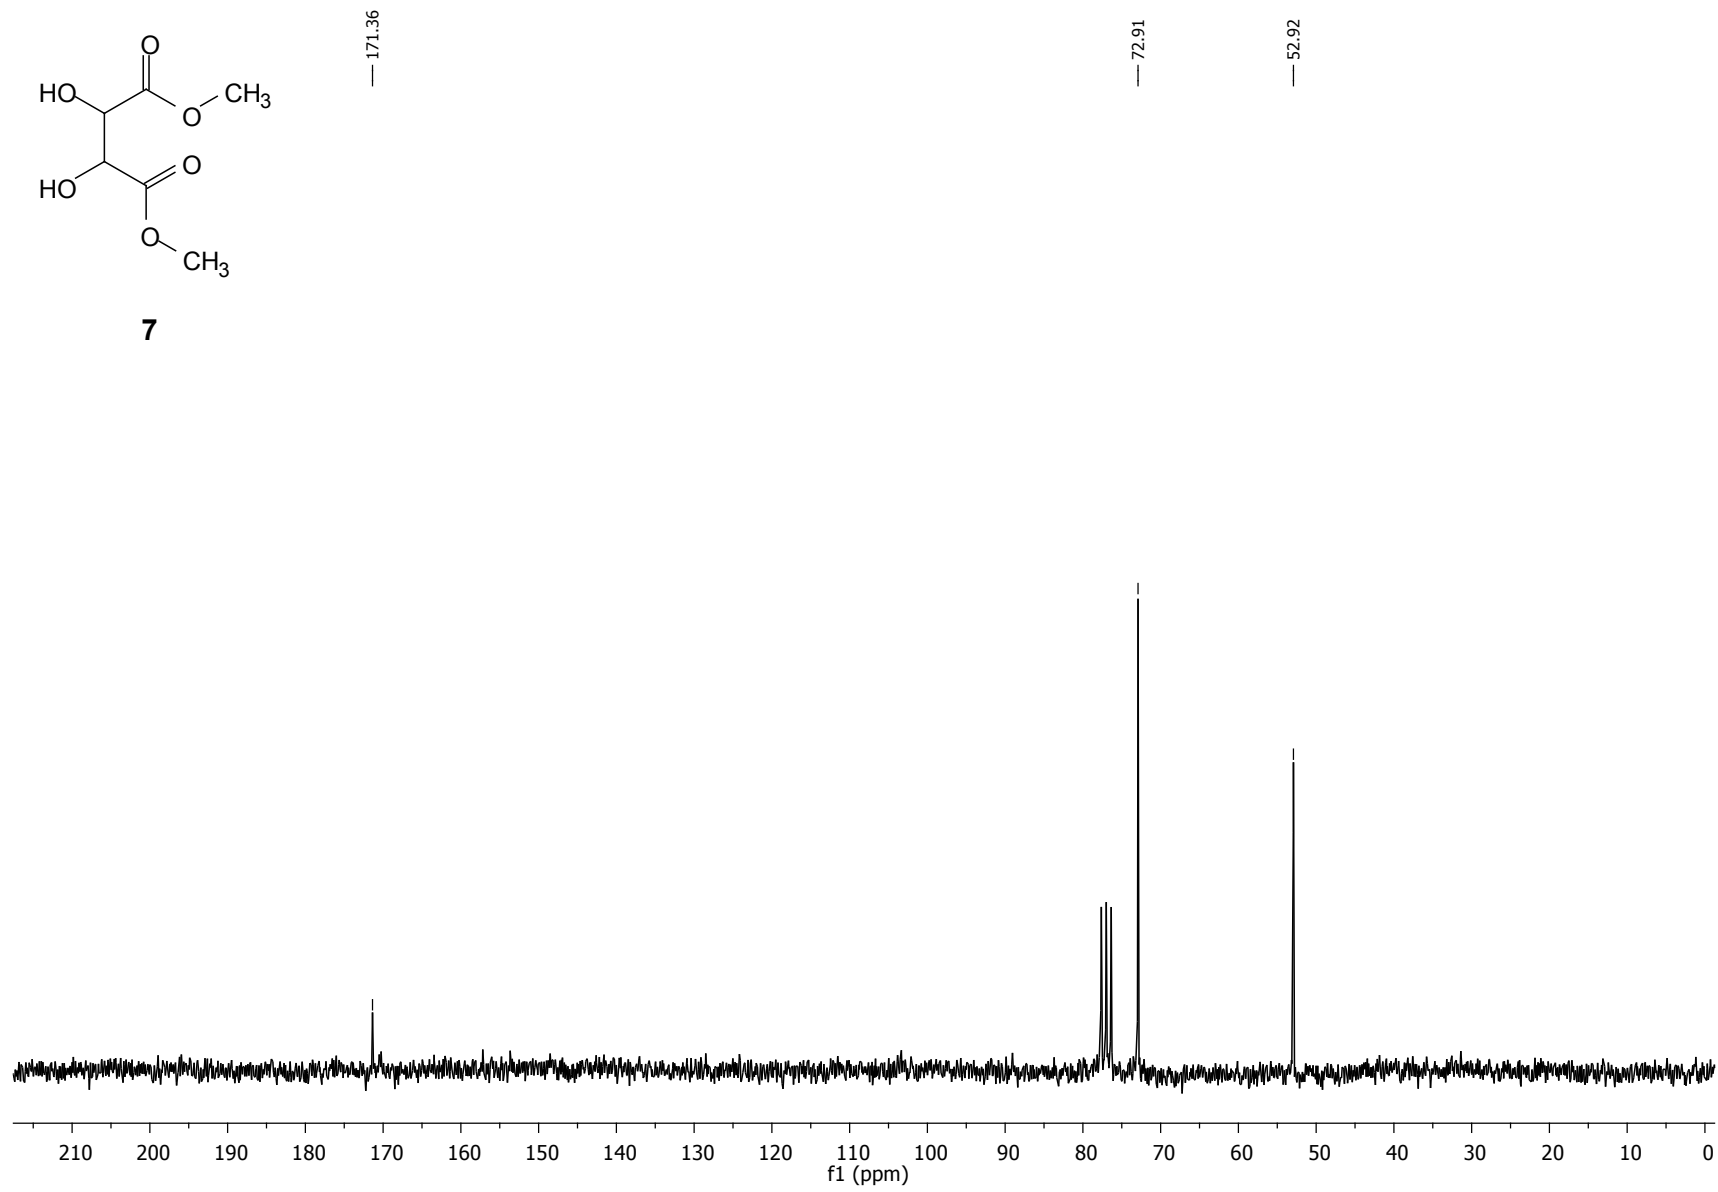

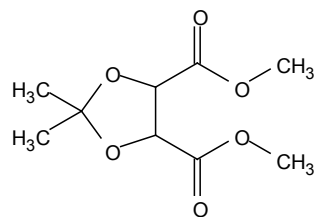

**8**

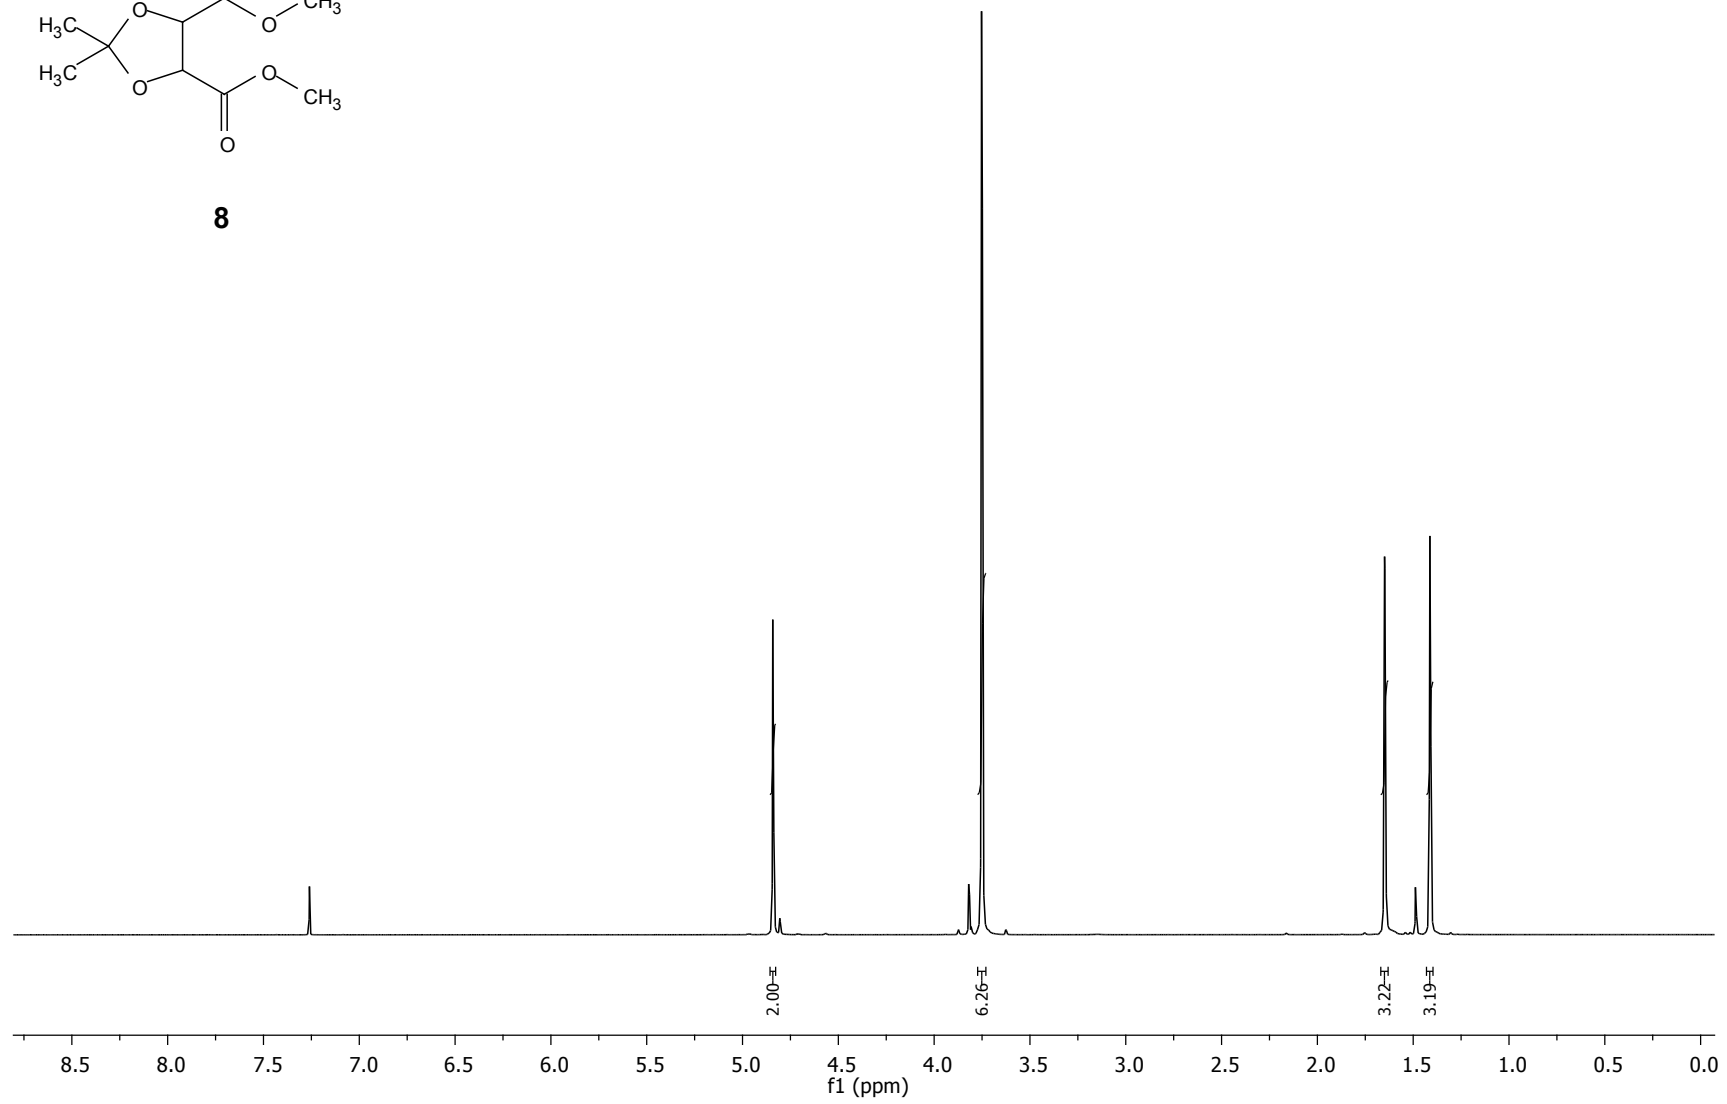

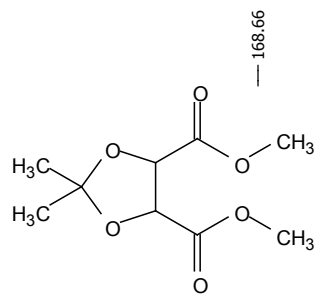

8

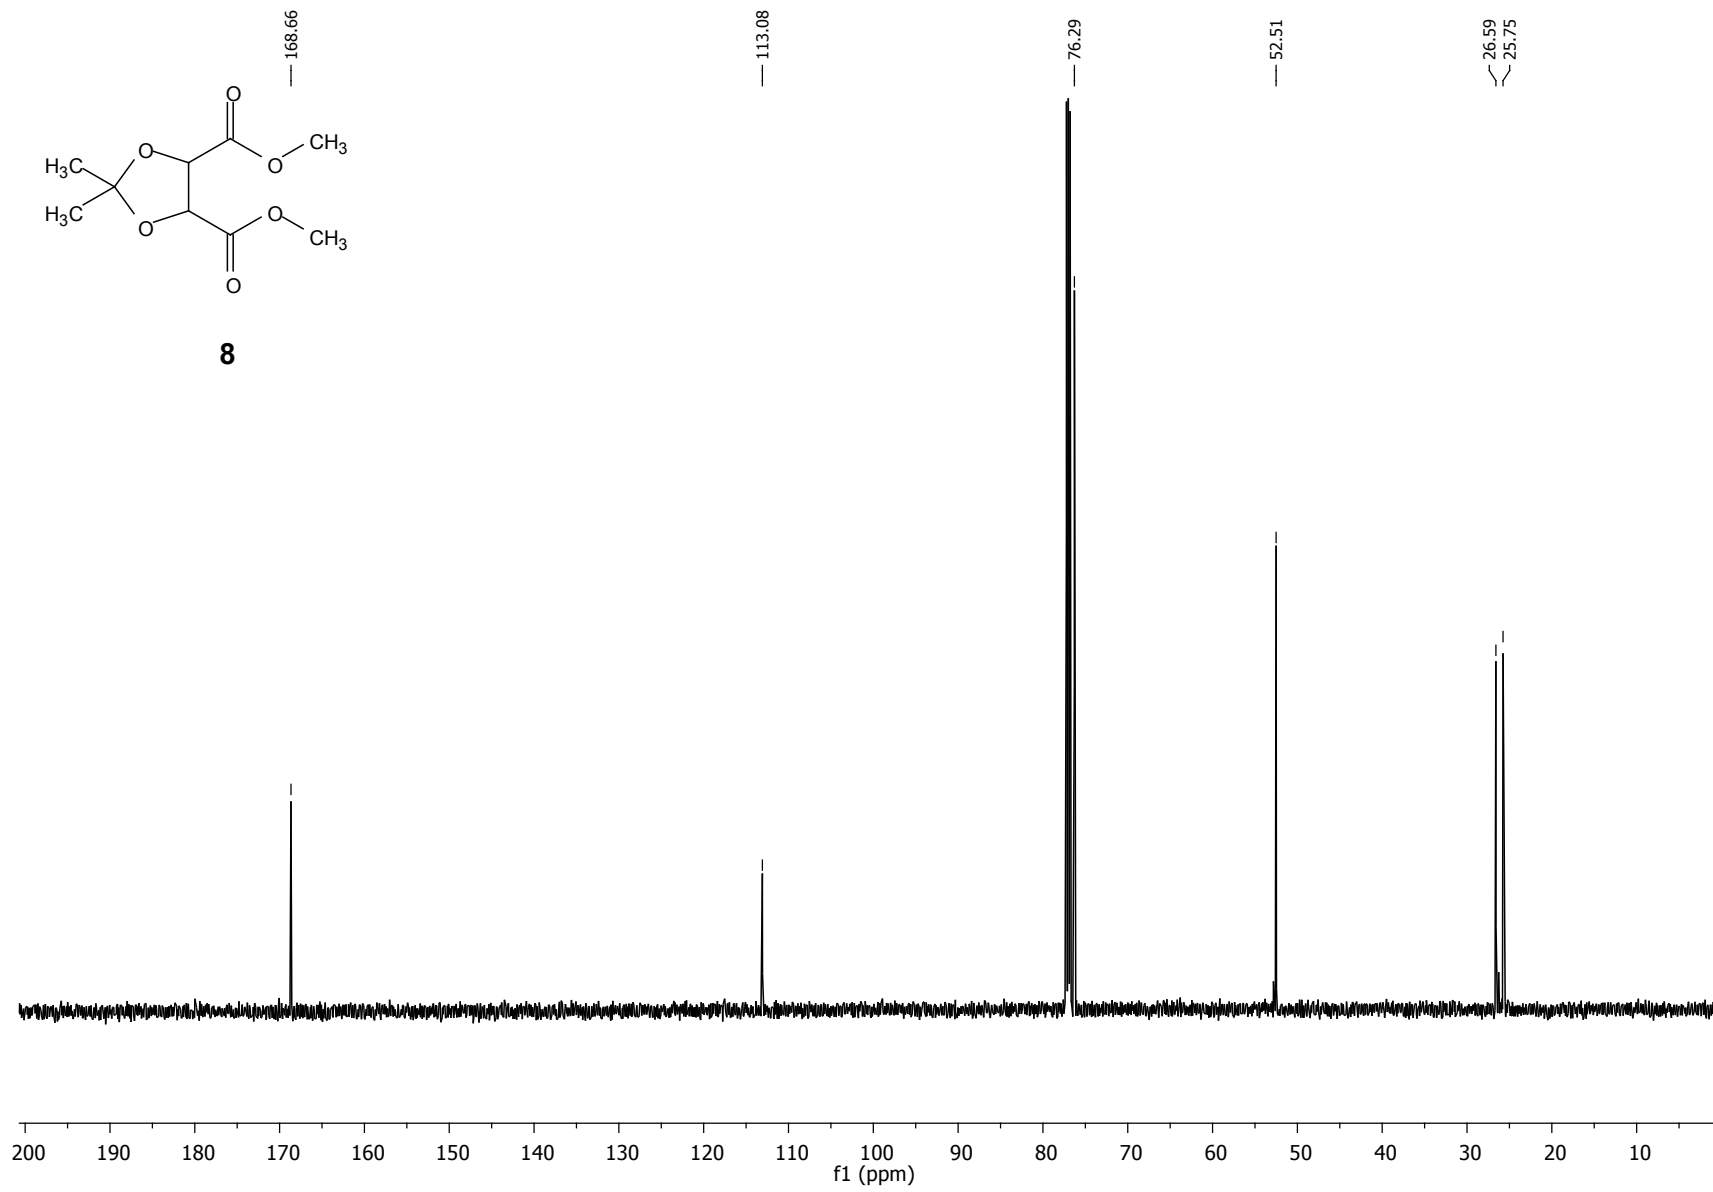

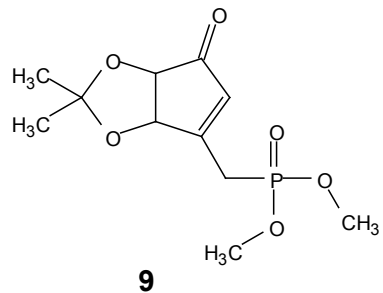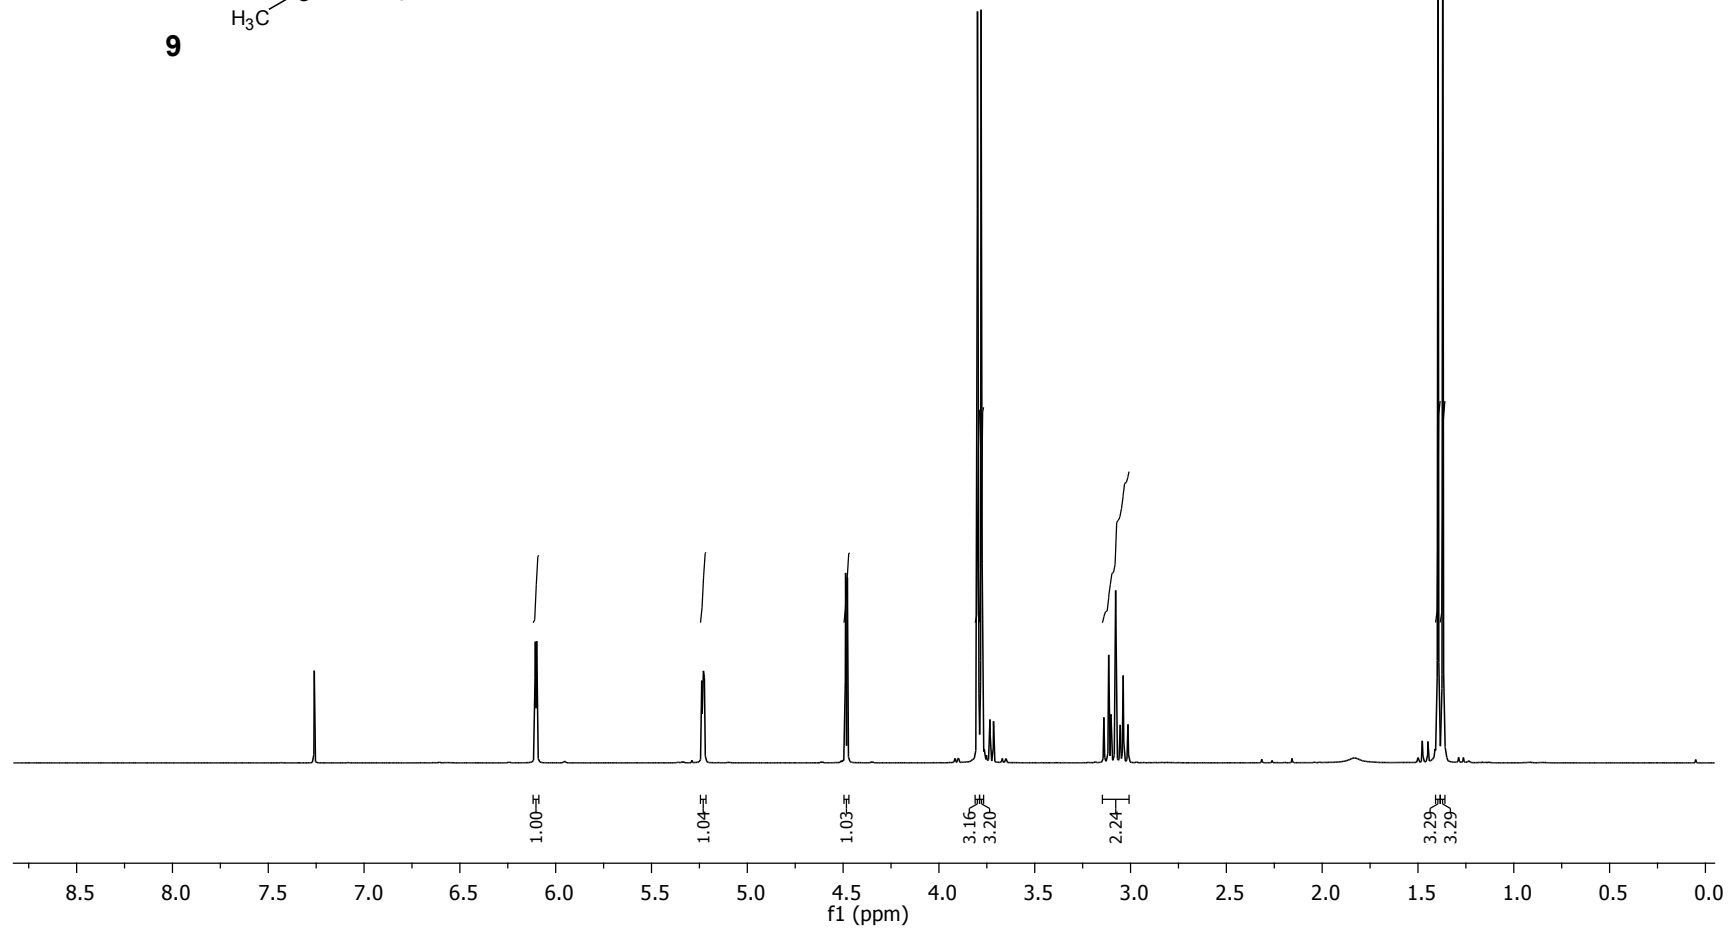

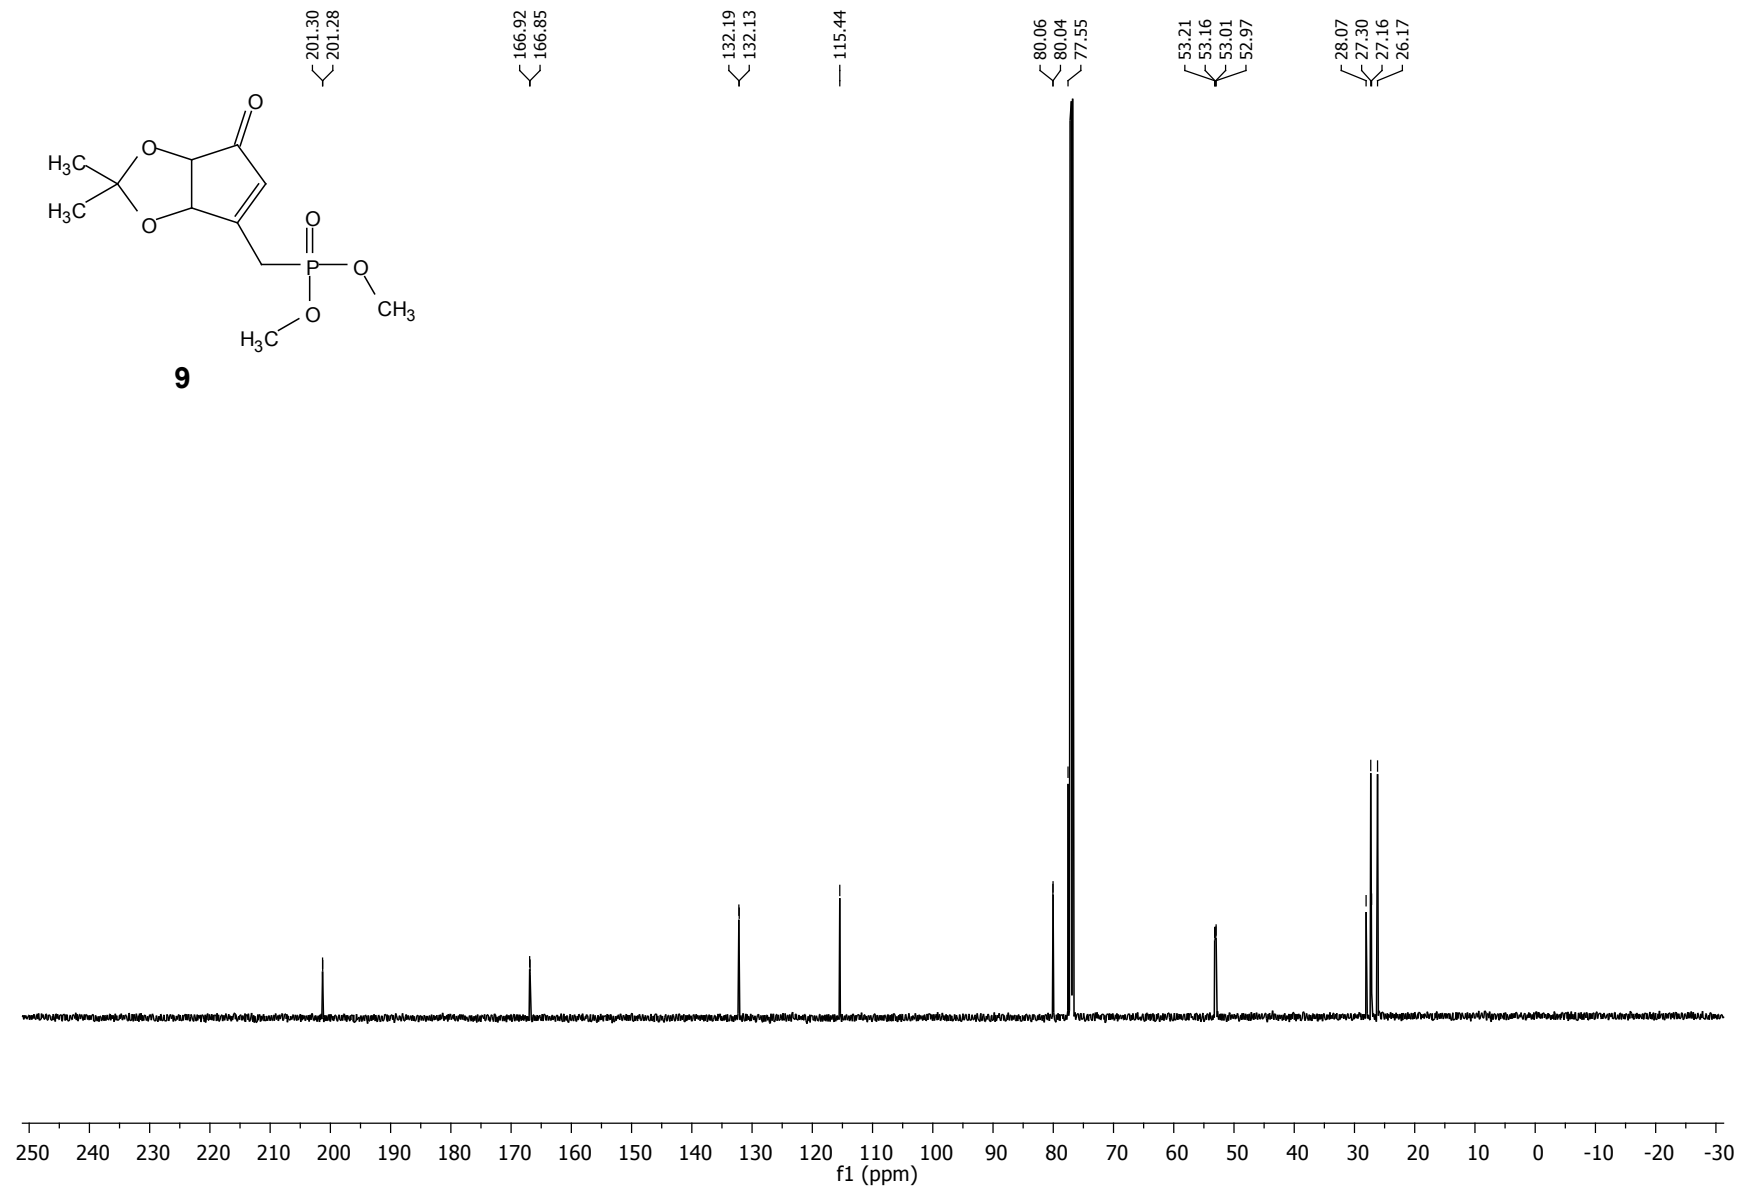

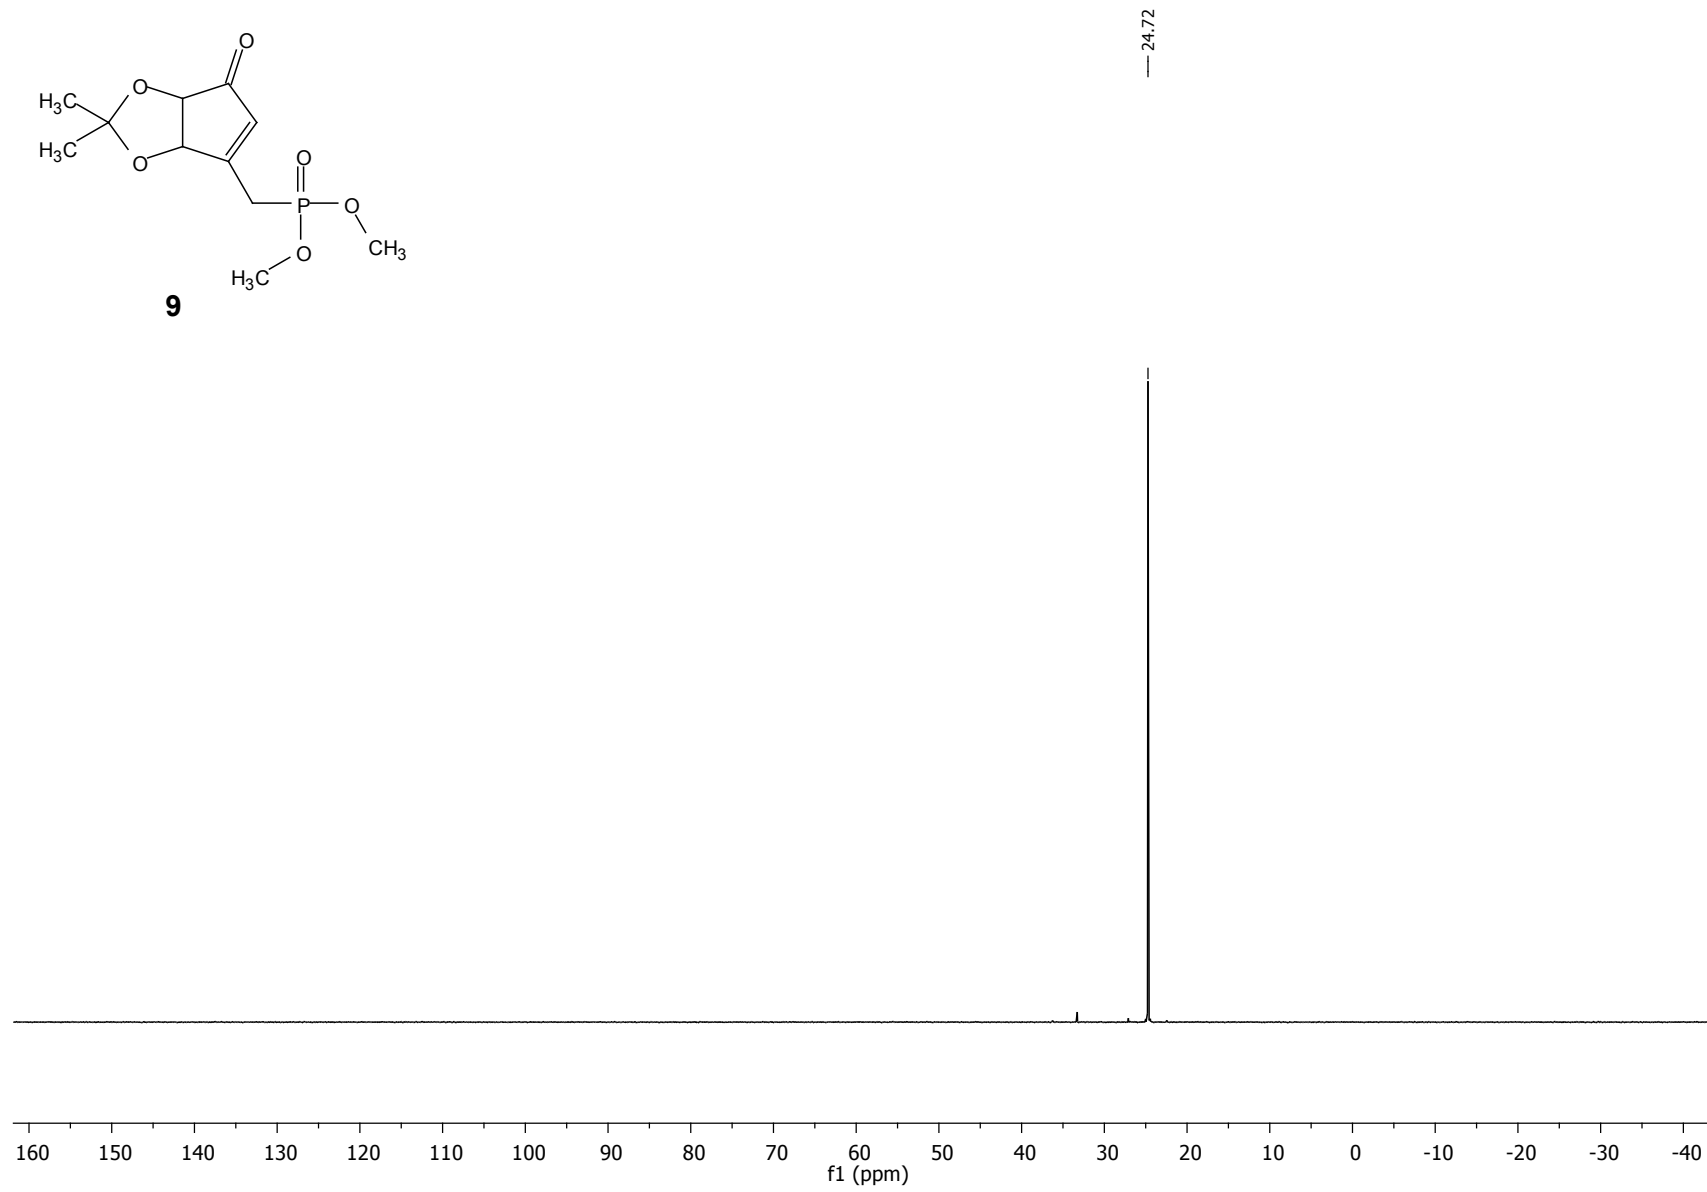



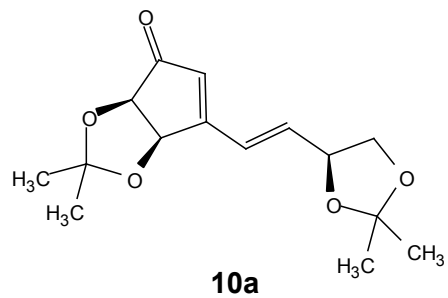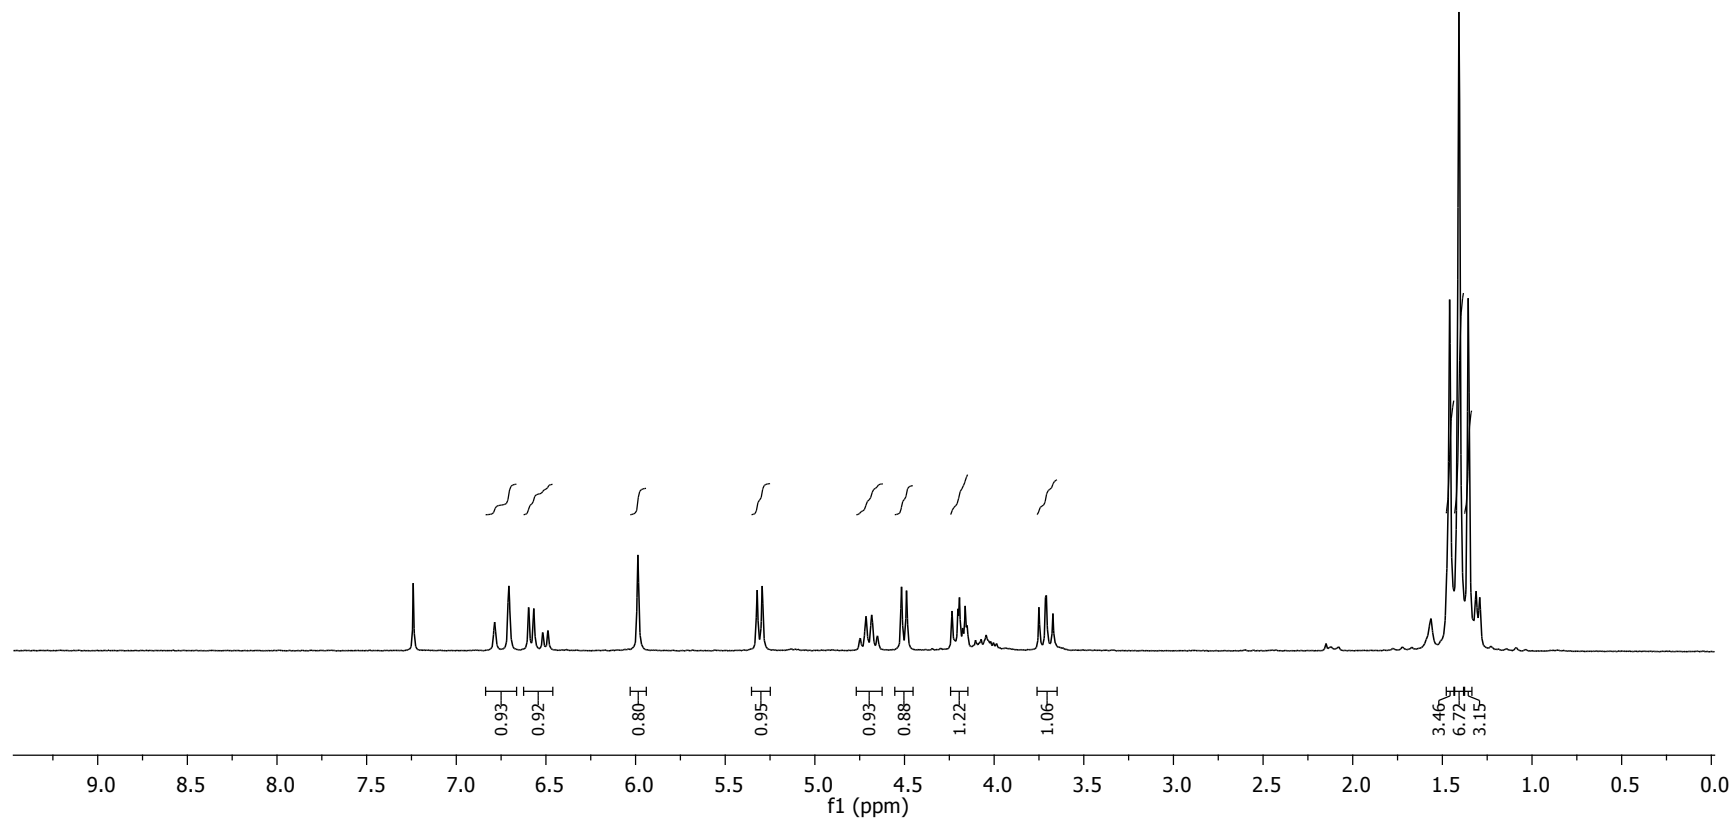

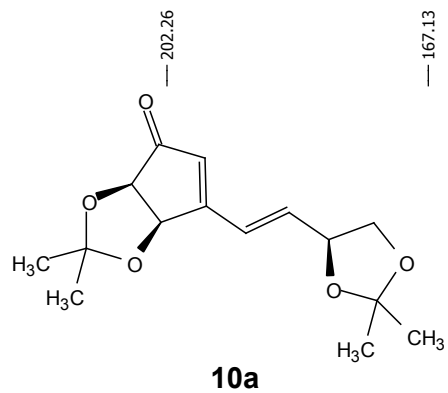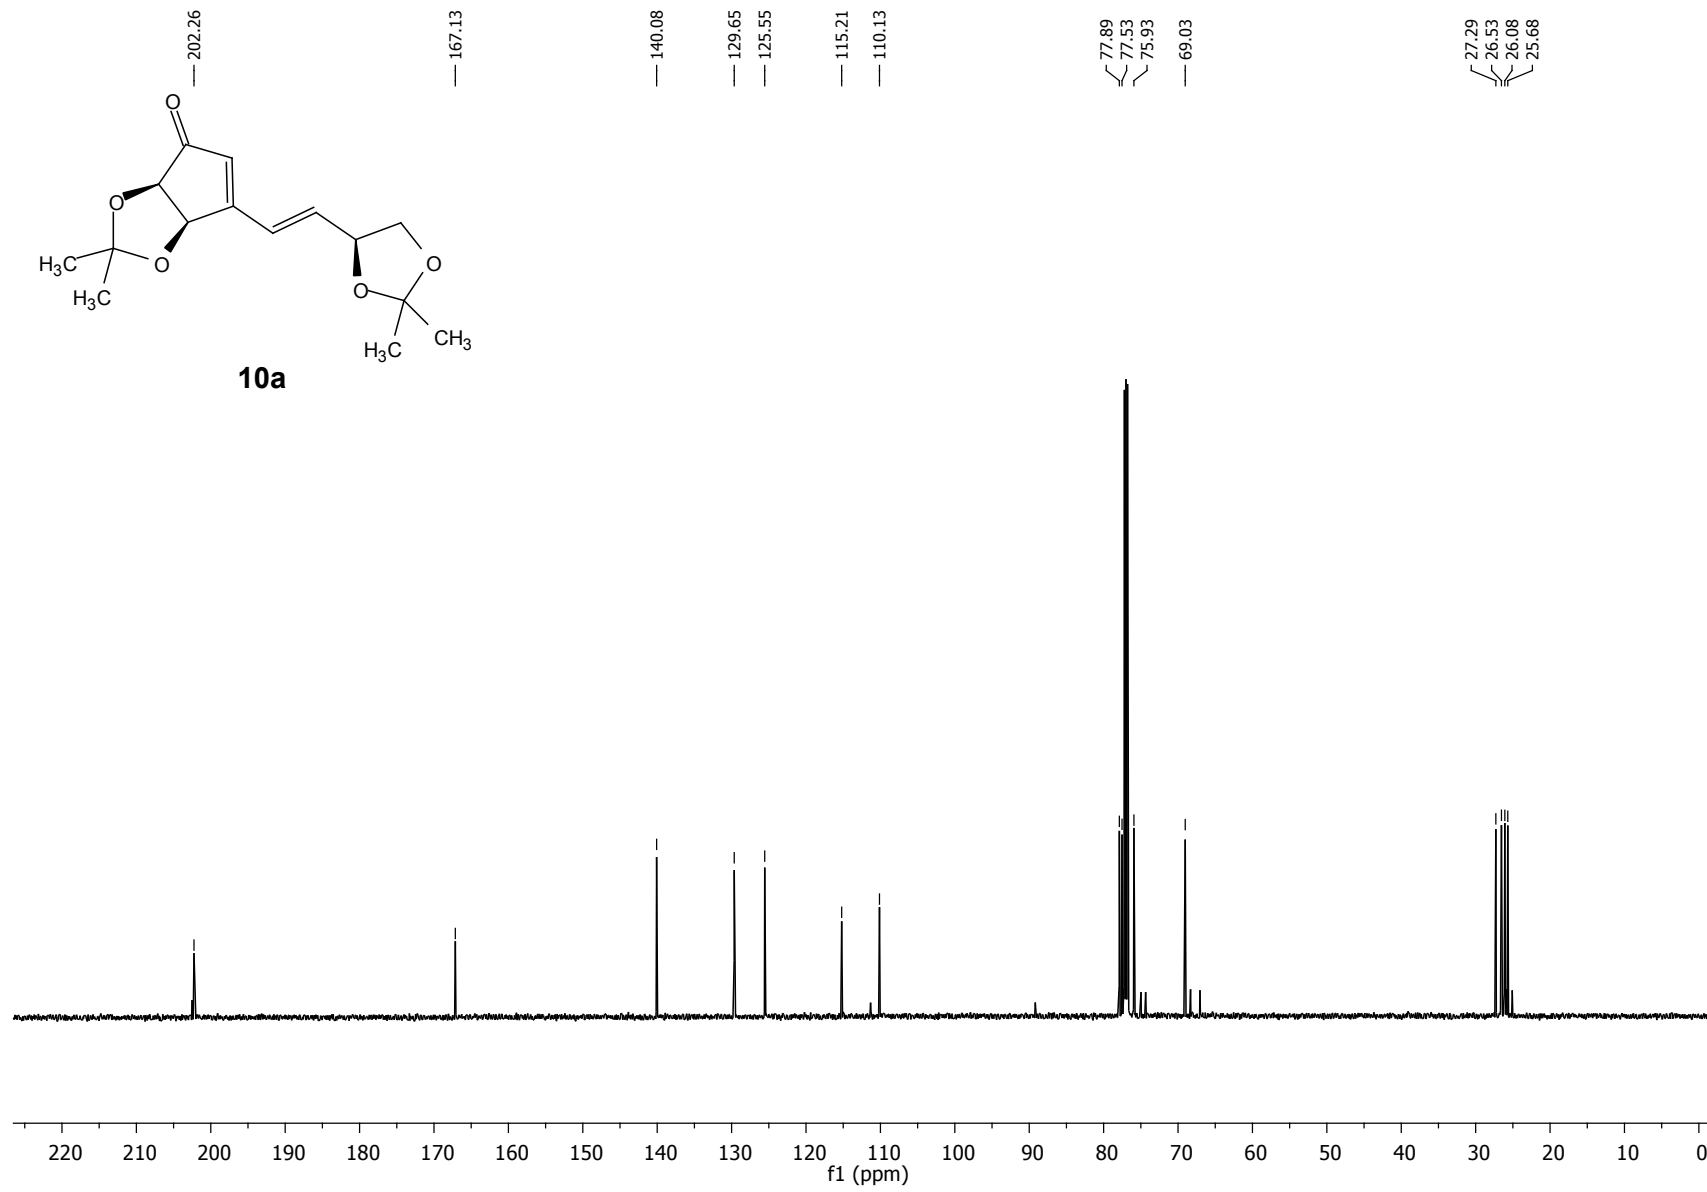

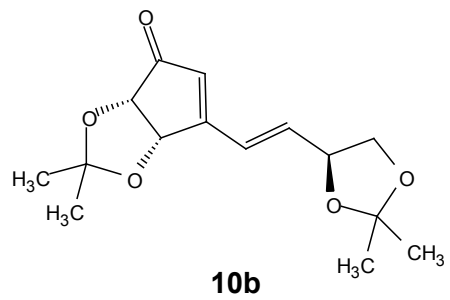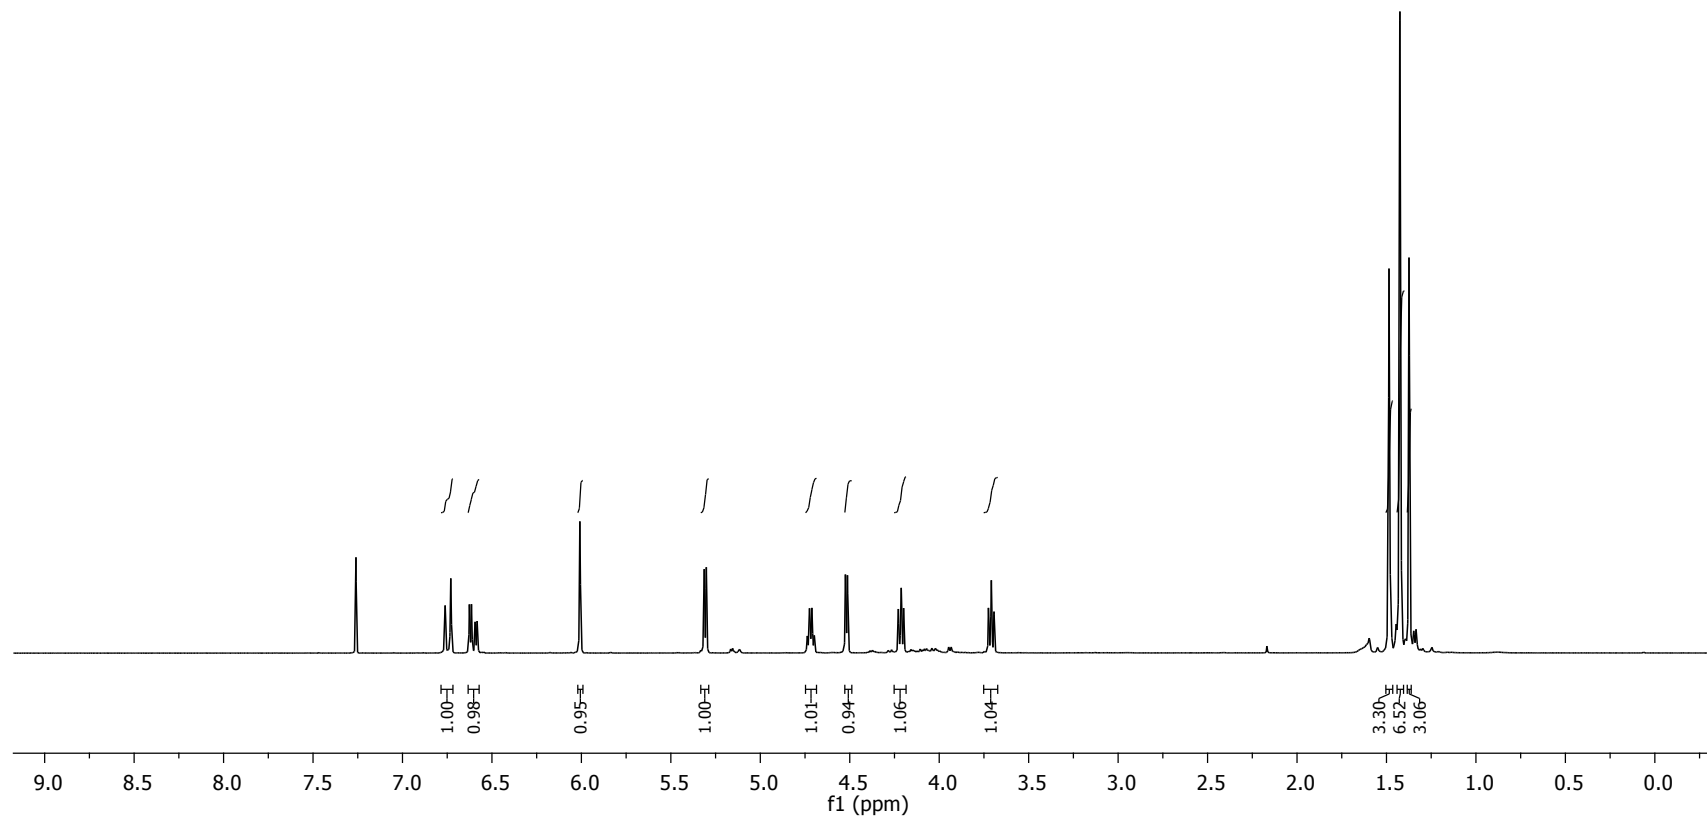

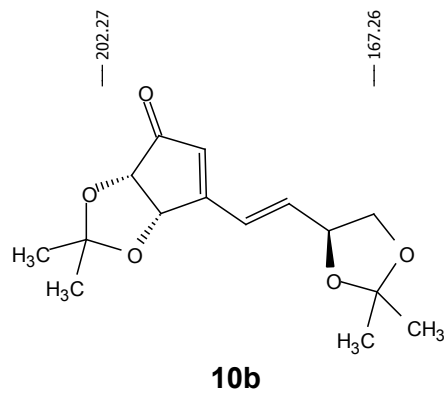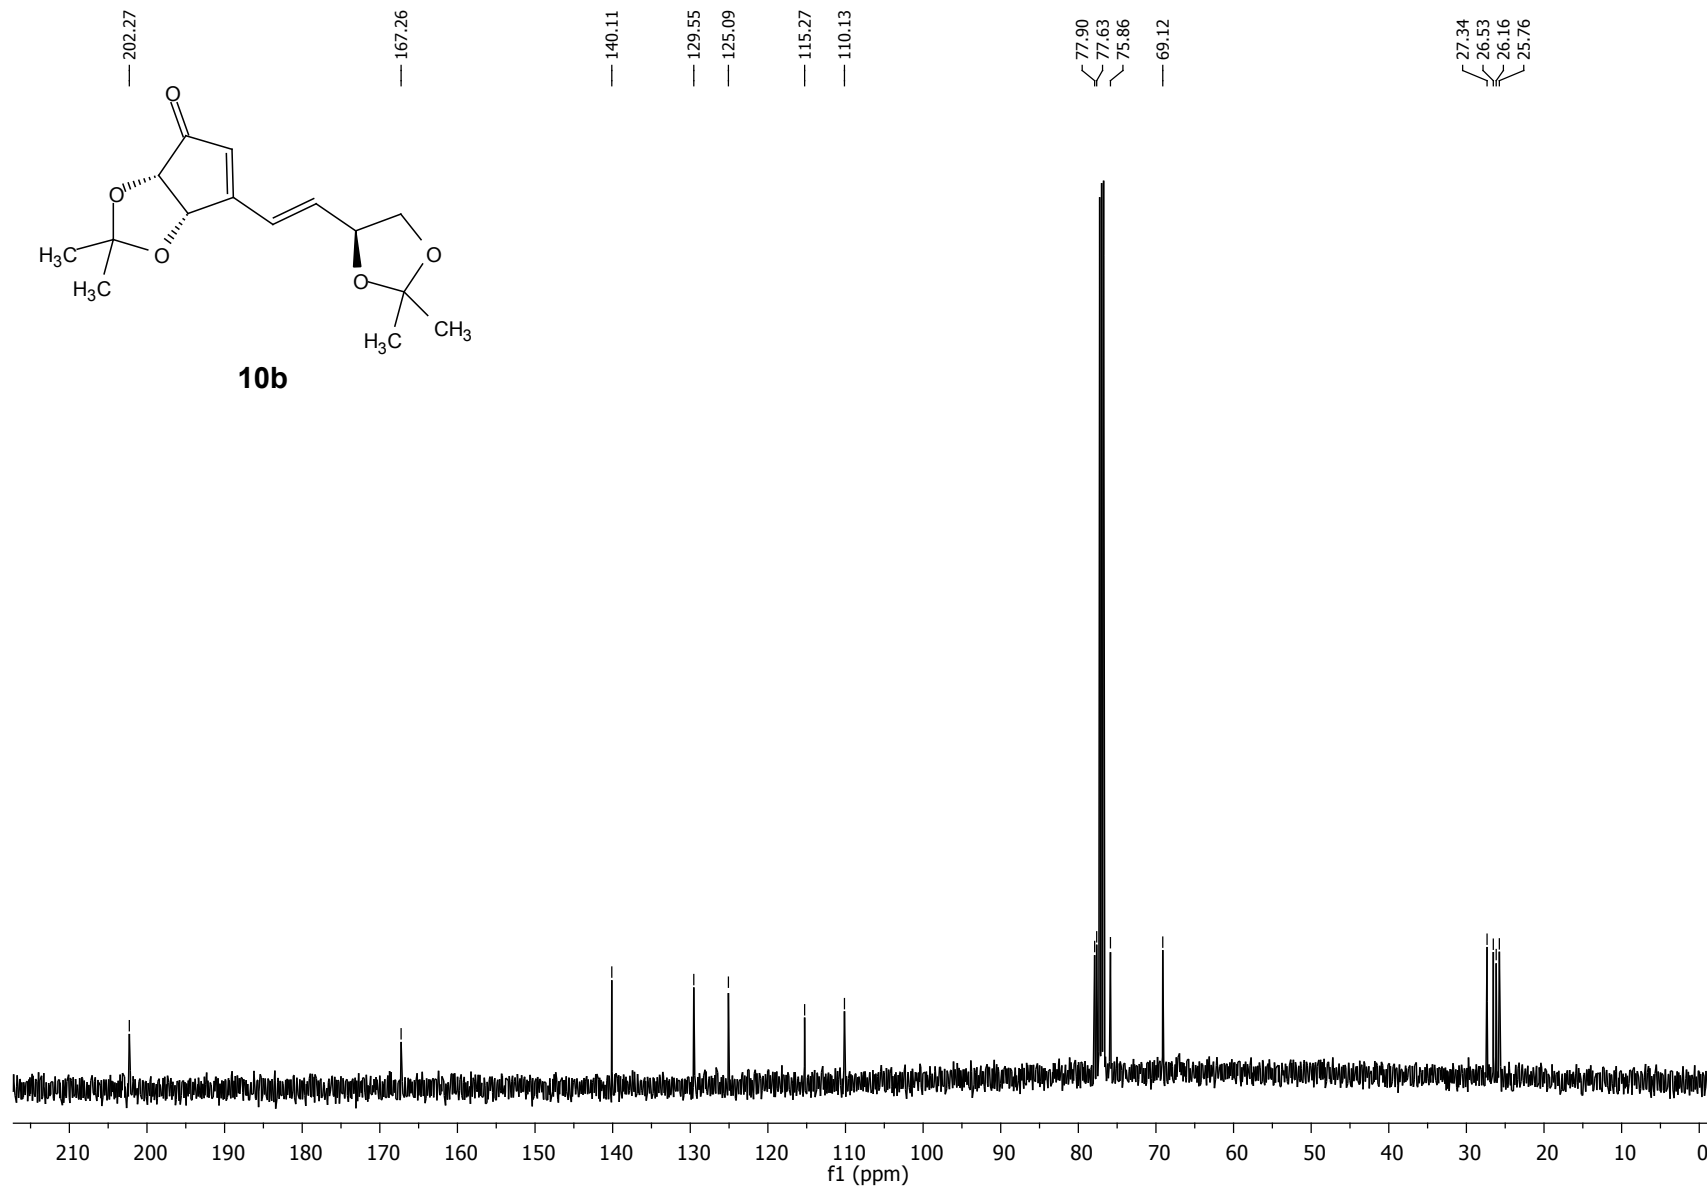

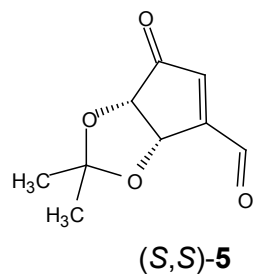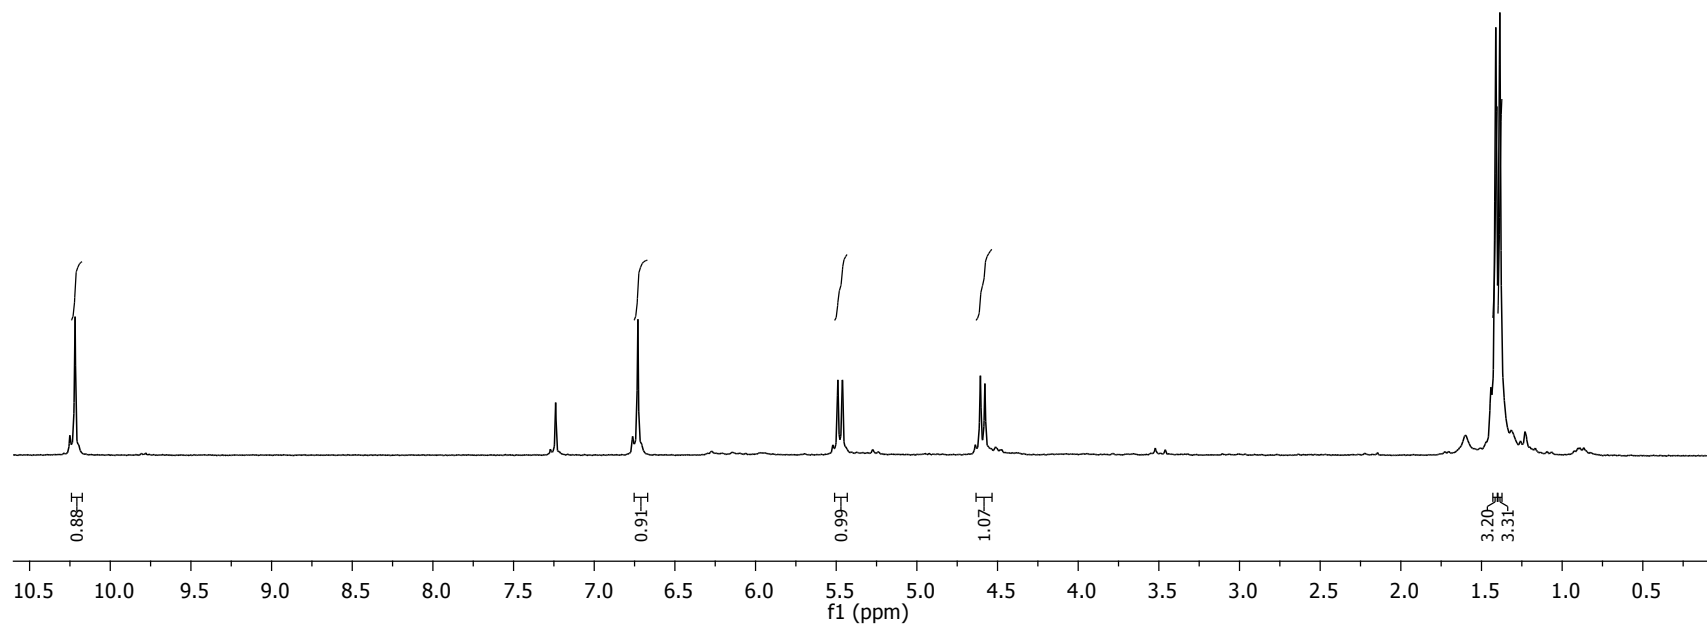

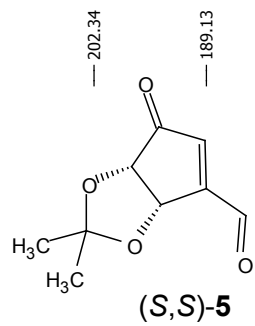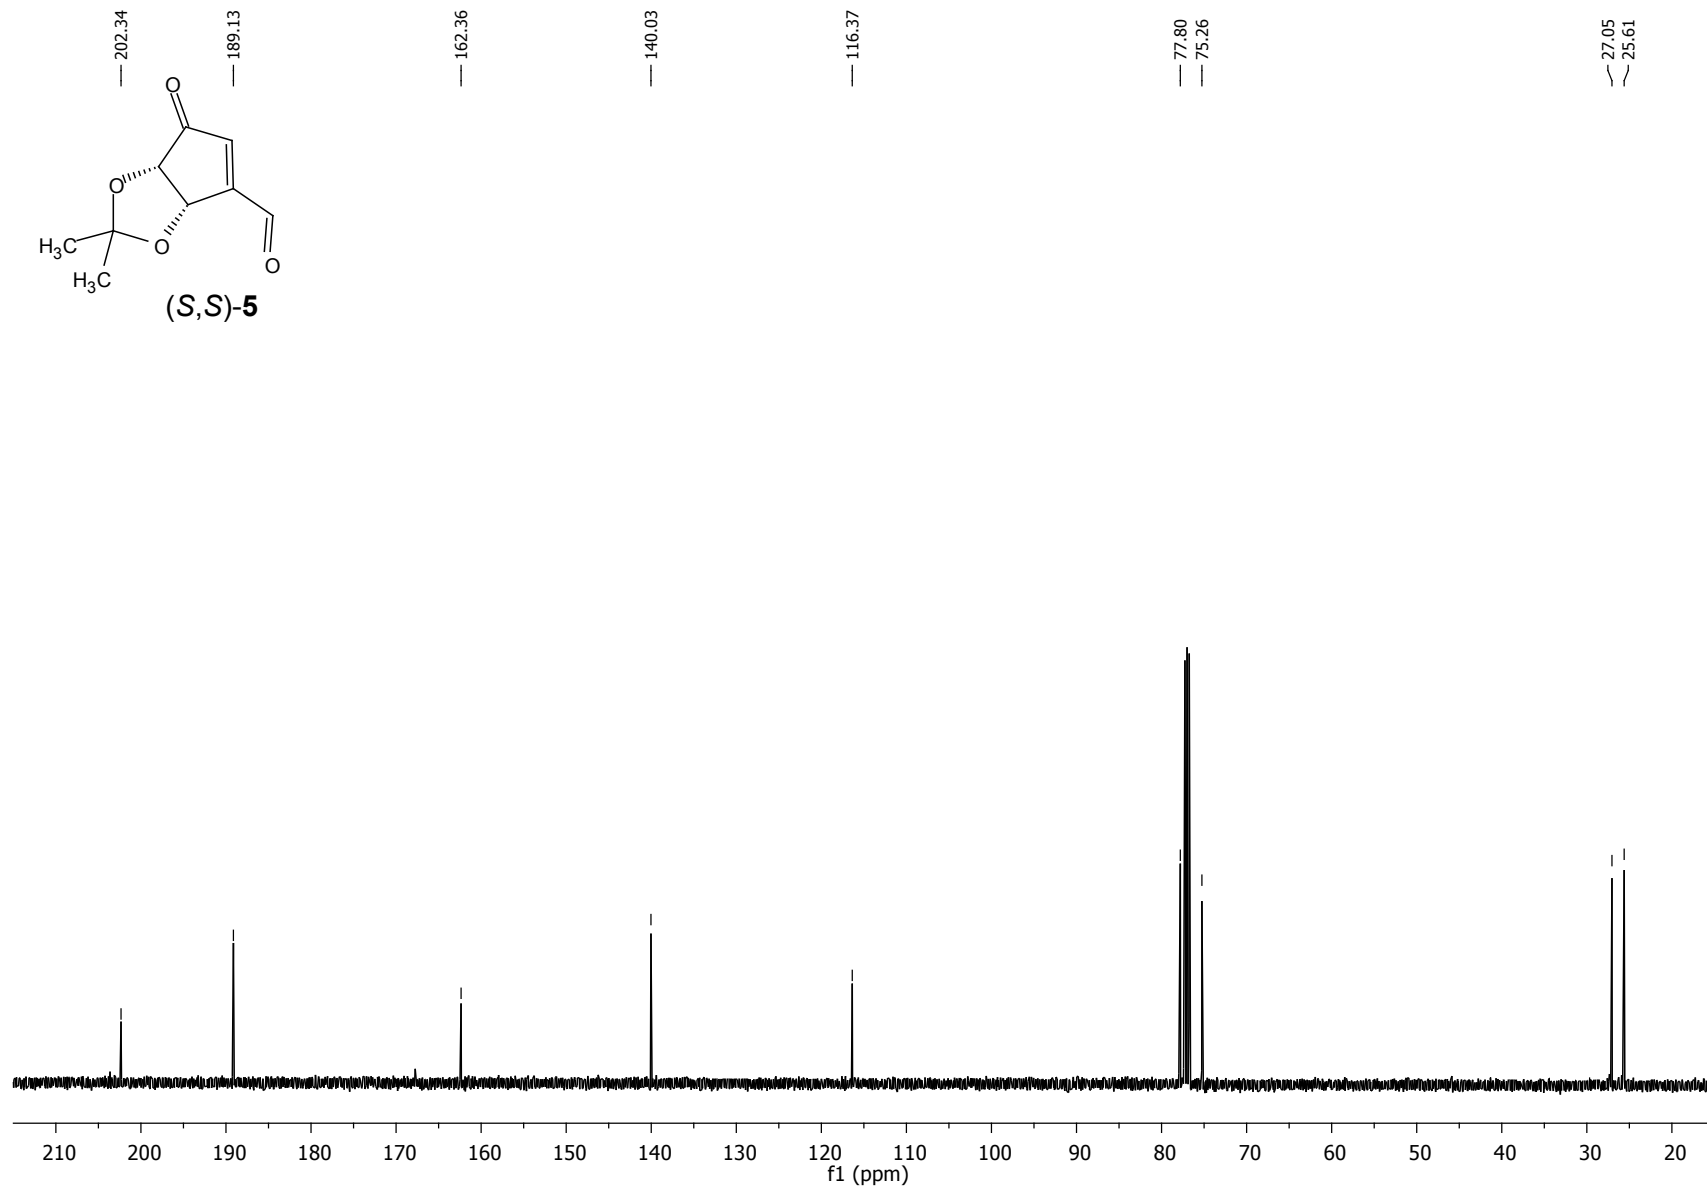

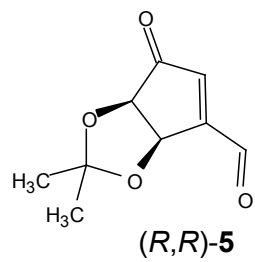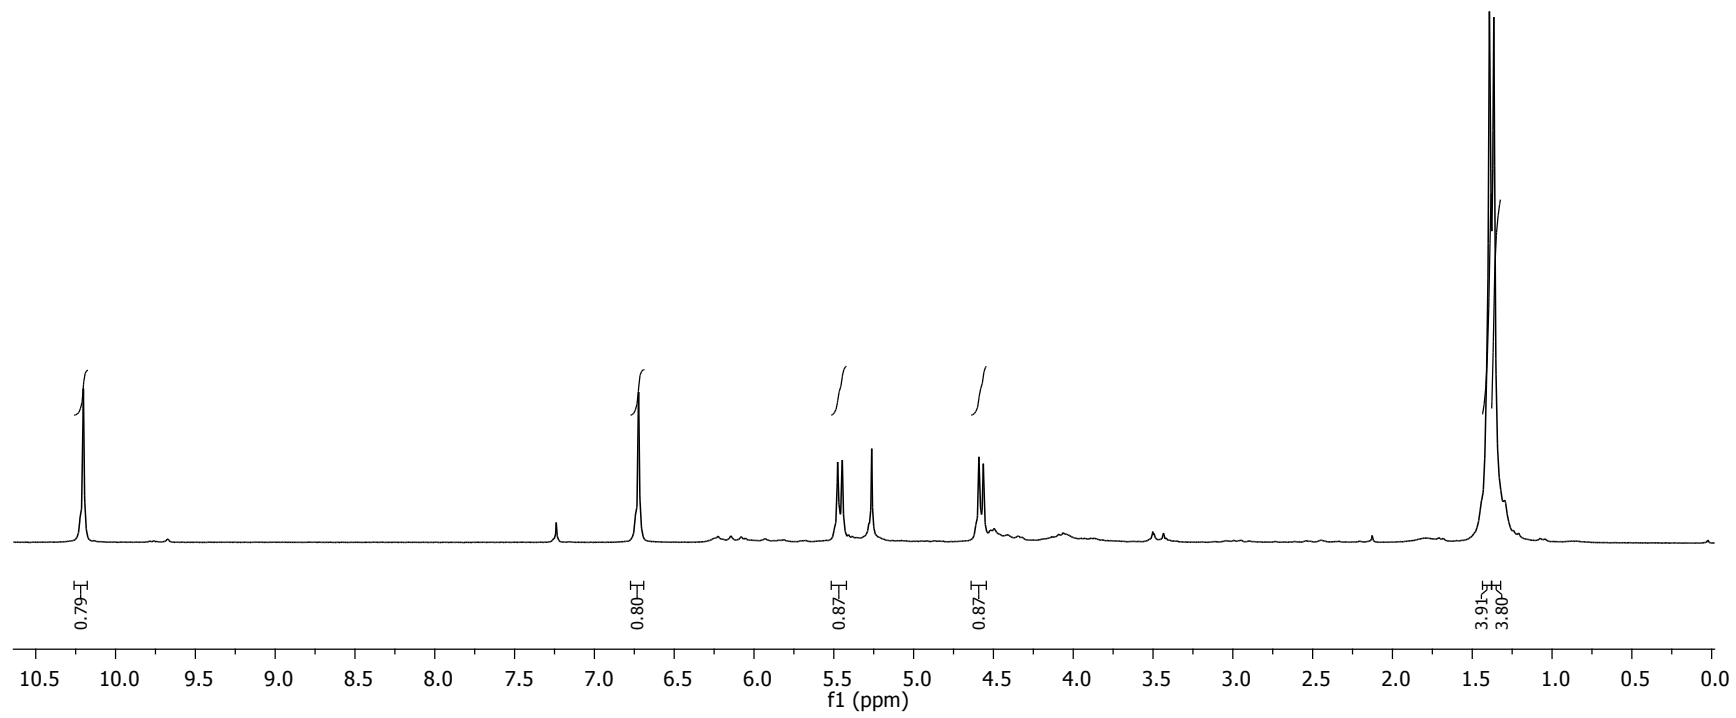

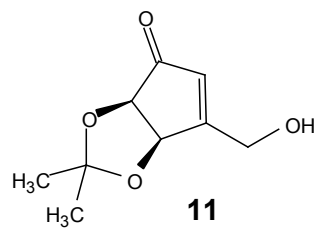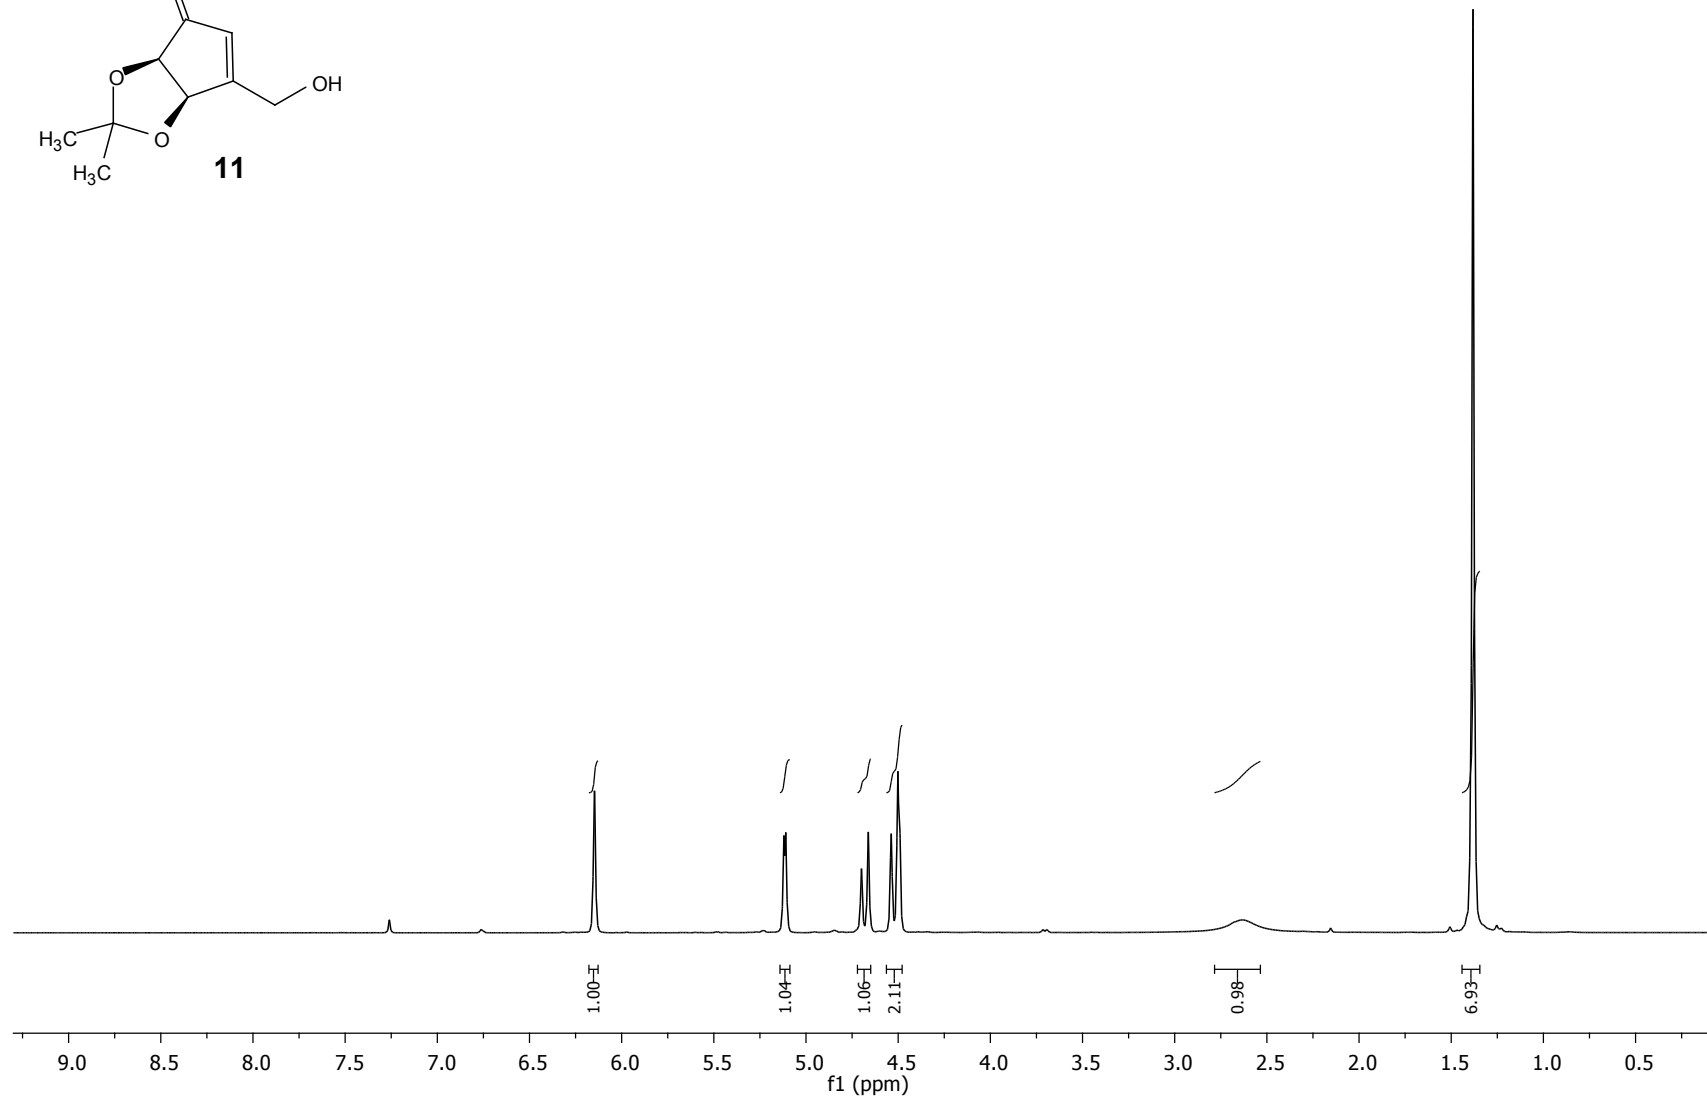



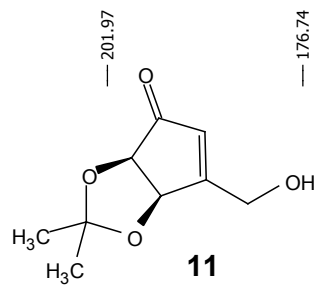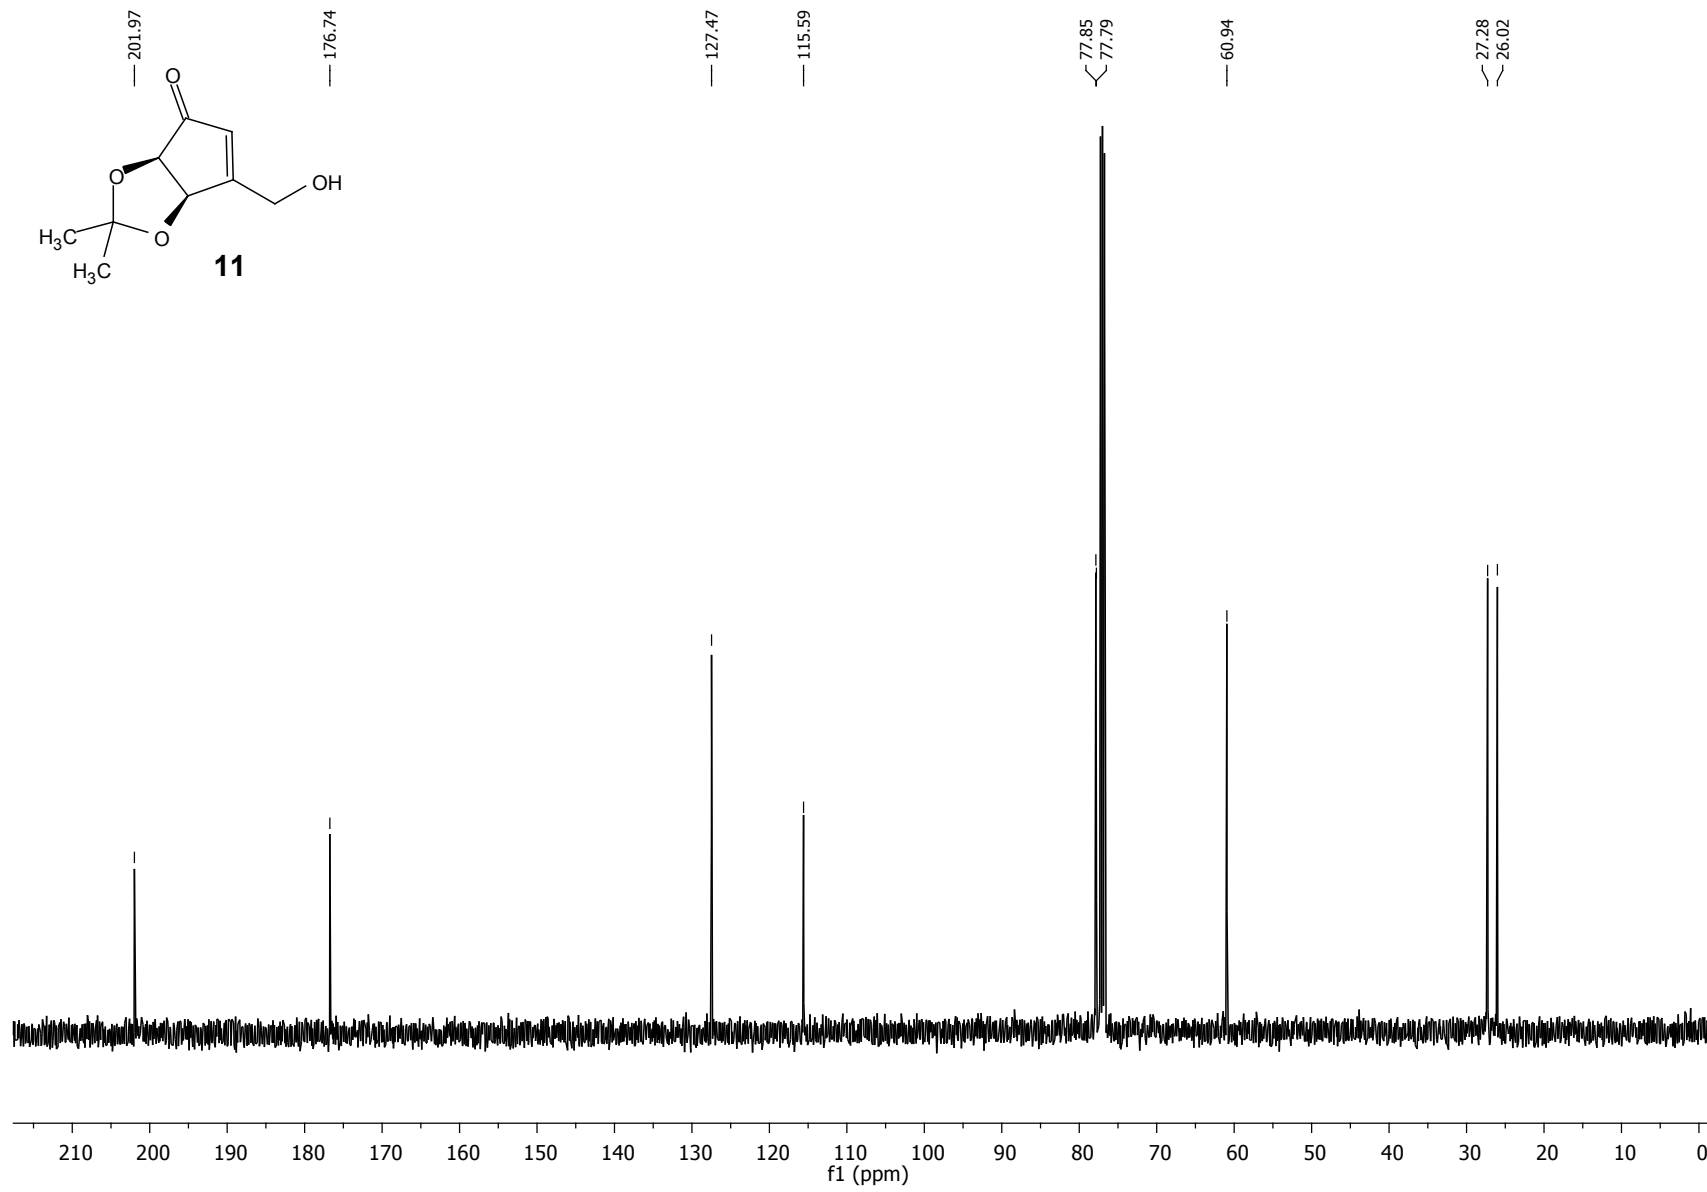

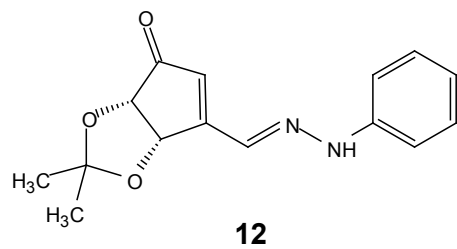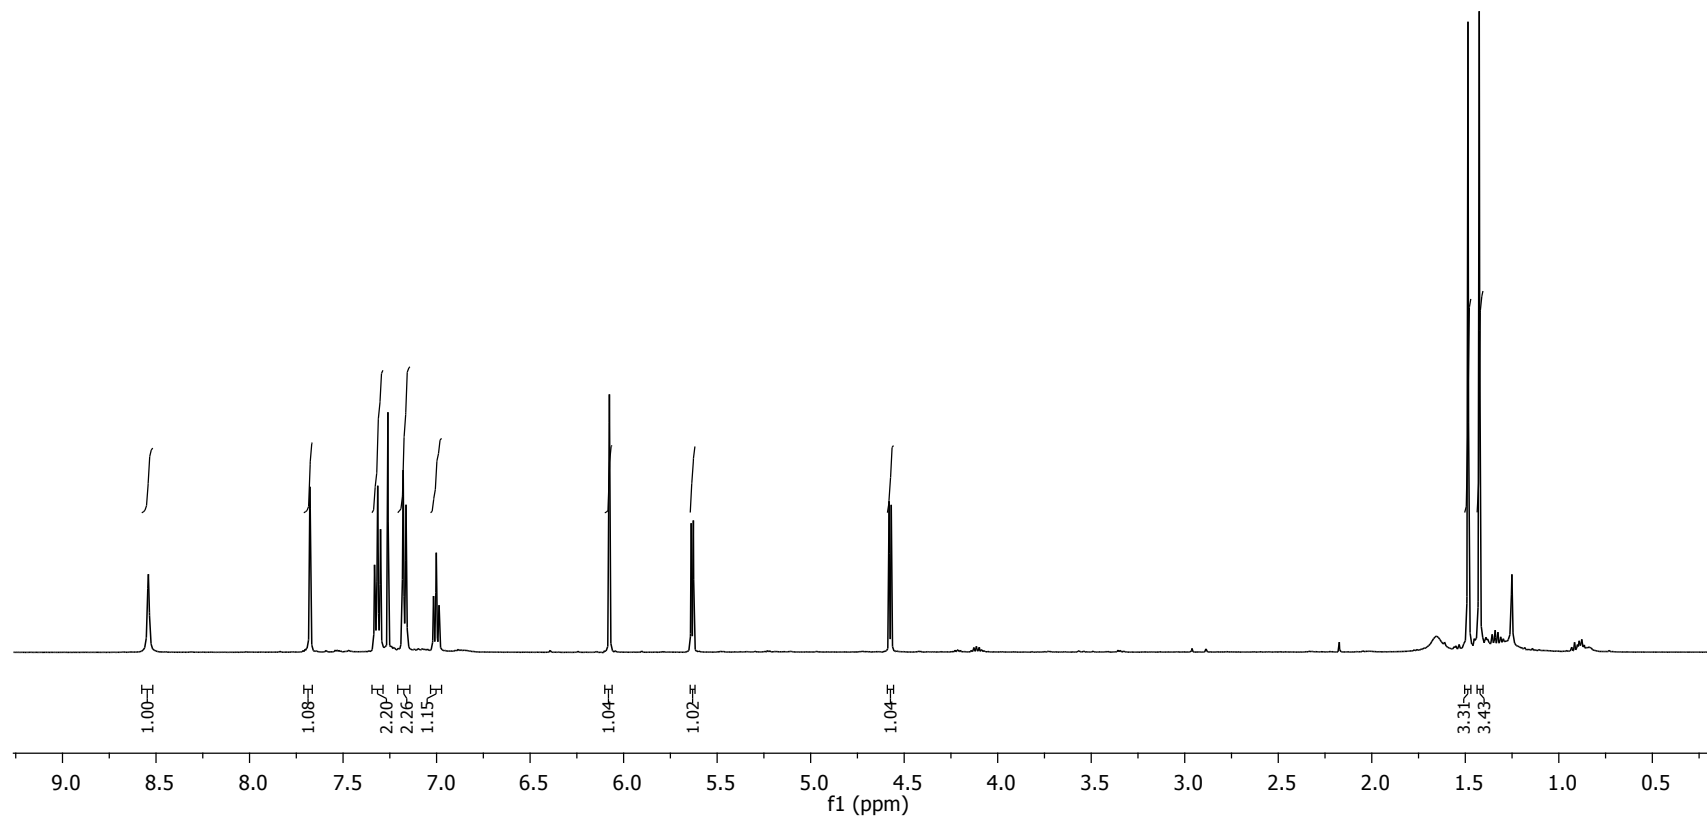

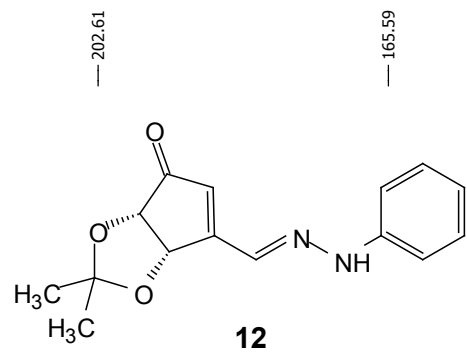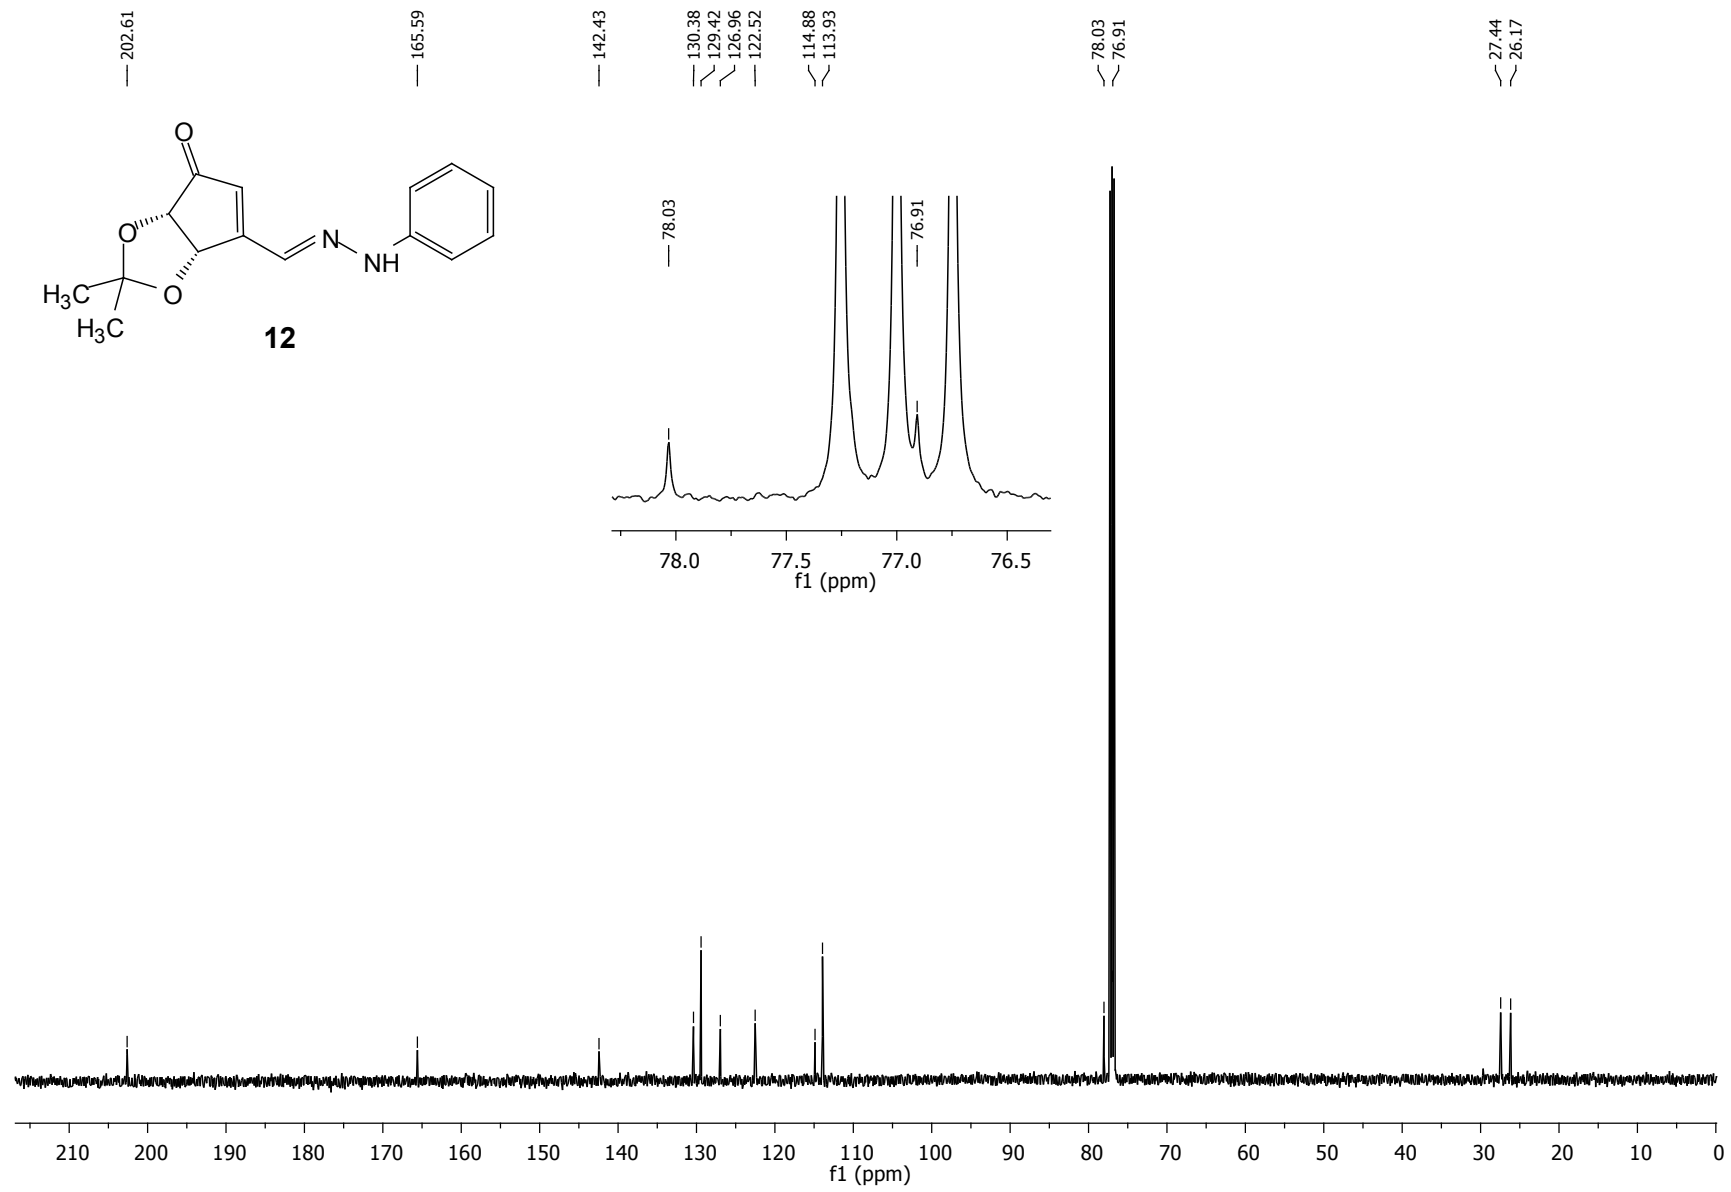

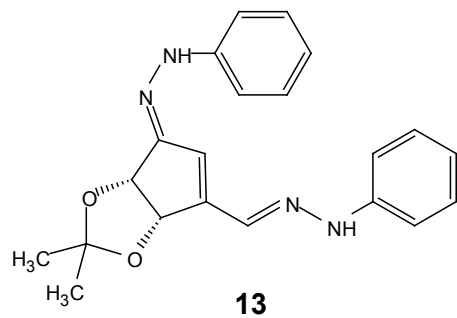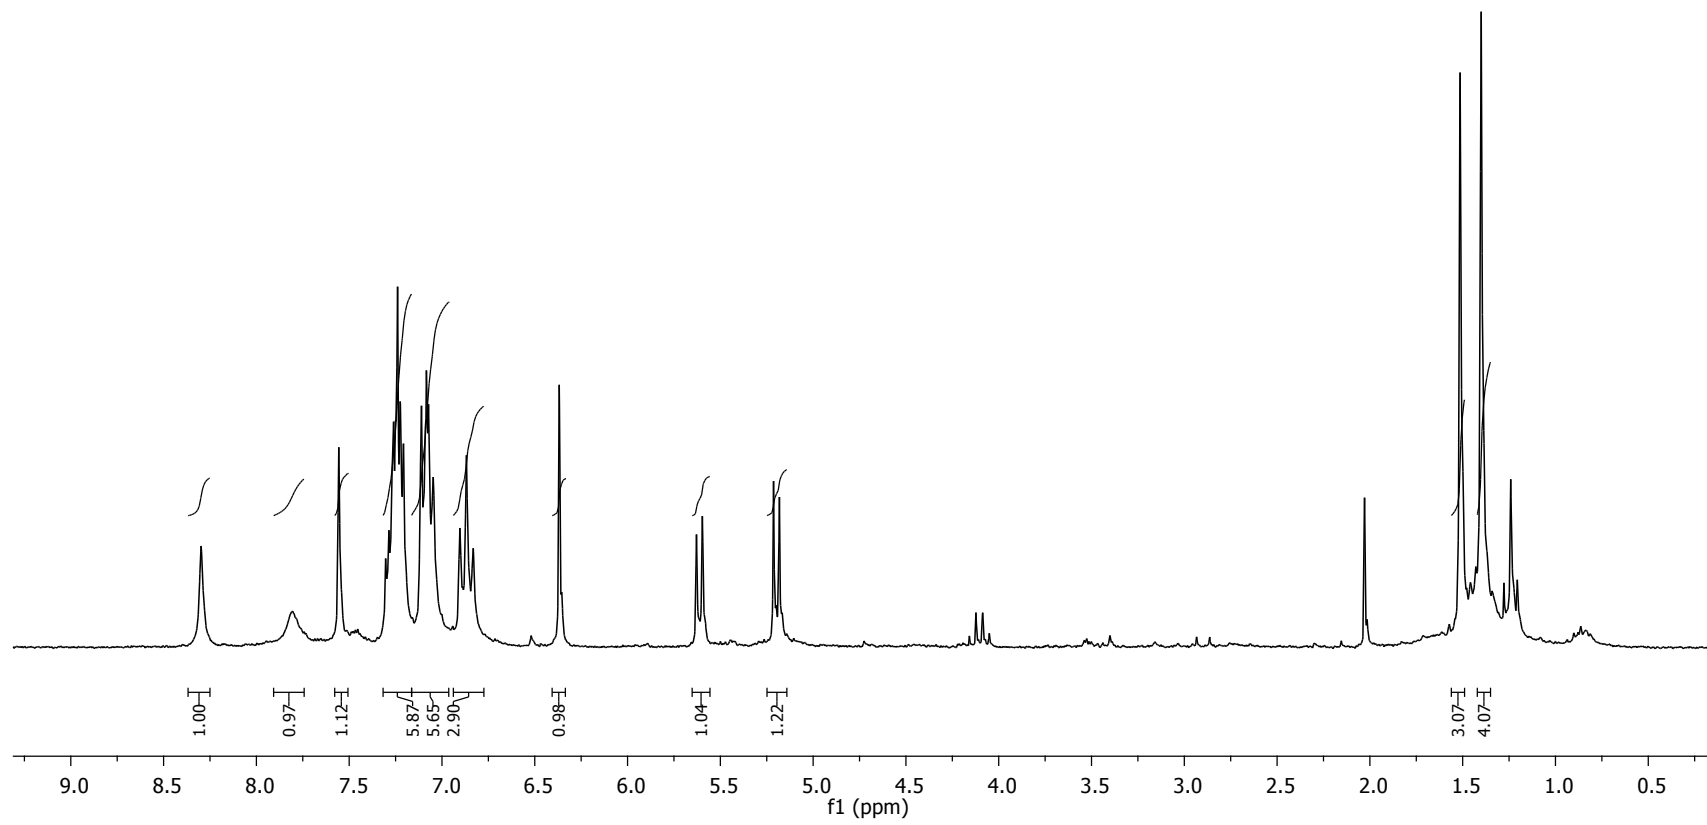

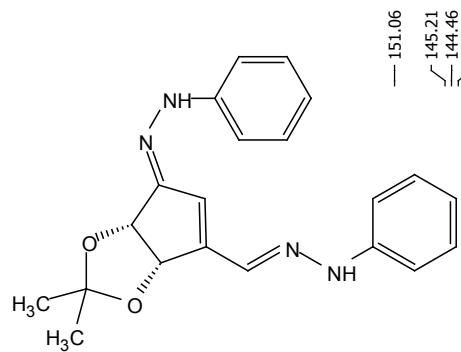

13

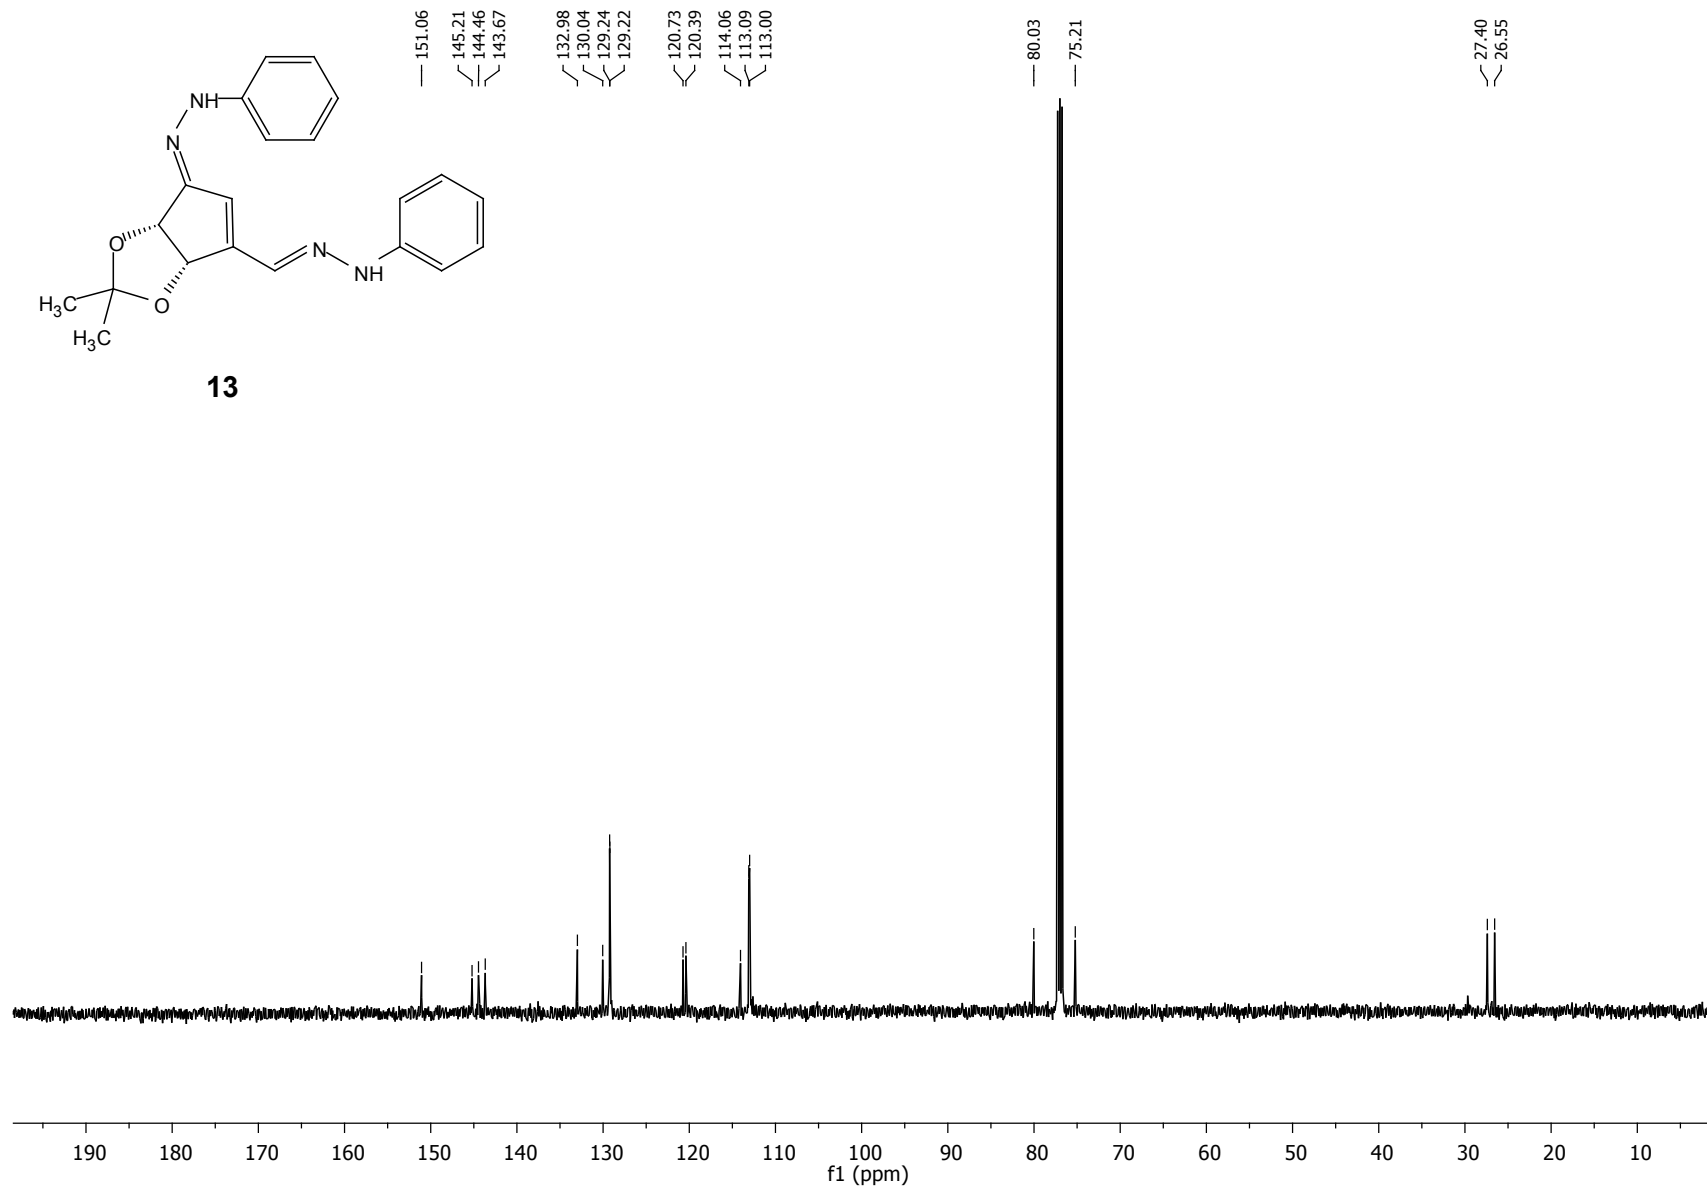

Energy, thermodynamic properties and geometry of **5a** optimized at the B3LYP-6-311++G(2d,2p) level in CH<sub>2</sub>Cl<sub>2</sub> (IEFPCM)

Energy: E(RB3LYP)=-650.0484757

|                                              |                             |
|----------------------------------------------|-----------------------------|
| Zero-point correction=                       | 0.178210 (Hartree/Particle) |
| Thermal correction to Energy=                | 0.190123                    |
| Thermal correction to Enthalpy=              | 0.191067                    |
| Thermal correction to Gibbs Free Energy=     | 0.139778                    |
| Sum of electronic and zero-point Energies=   | -649.870265                 |
| Sum of electronic and thermal Energies=      | -649.858353                 |
| Sum of electronic and thermal Enthalpies=    | -649.857409                 |
| Sum of electronic and thermal Free Energies= | -649.908698                 |

| Center<br>Number | Atomic<br>Number | Atomic<br>Type | Coordinates (Angstroms) |           |           |
|------------------|------------------|----------------|-------------------------|-----------|-----------|
|                  |                  |                | X                       | Y         | Z         |
| 1                | 6                | 0              | 0.347783                | -0.396381 | -0.675053 |
| 2                | 6                | 0              | -0.244694               | 1.026573  | -0.712919 |
| 3                | 1                | 0              | 0.469432                | -0.849673 | -1.658696 |
| 4                | 1                | 0              | -0.437060               | 1.399191  | -1.720070 |
| 5                | 6                | 0              | 1.916632                | 1.034439  | 0.402507  |
| 6                | 1                | 0              | 2.789208                | 1.397802  | 0.925448  |
| 7                | 6                | 0              | 1.676430                | -0.233044 | 0.033630  |
| 8                | 6                | 0              | 0.794055                | 1.911381  | 0.000217  |
| 9                | 8                | 0              | 0.697283                | 3.102013  | 0.191048  |
| 10               | 8                | 0              | -1.434062               | 0.954420  | 0.059798  |
| 11               | 8                | 0              | -0.567316               | -1.148275 | 0.120489  |
| 12               | 6                | 0              | -1.810021               | -0.431585 | 0.159283  |
| 13               | 6                | 0              | -2.696361               | -0.827440 | -1.016570 |
| 14               | 1                | 0              | -2.944144               | -1.885986 | -0.955602 |
| 15               | 1                | 0              | -3.618678               | -0.248843 | -0.999076 |
| 16               | 1                | 0              | -2.192255               | -0.645338 | -1.964917 |
| 17               | 6                | 0              | -2.462419               | -0.659585 | 1.505392  |
| 18               | 1                | 0              | -3.381223               | -0.080046 | 1.576564  |
| 19               | 1                | 0              | -2.707925               | -1.713308 | 1.625822  |
| 20               | 1                | 0              | -1.785077               | -0.356377 | 2.300703  |
| 21               | 6                | 0              | 2.615234                | -1.349671 | 0.254026  |
| 22               | 8                | 0              | 2.431972                | -2.464862 | -0.184496 |
| 23               | 1                | 0              | 3.516151                | -1.106624 | 0.840261  |

Energy, thermodynamic properties and geometry of **5b** optimized at the B3LYP-6-311++G(2d,2p) level in CH<sub>2</sub>Cl<sub>2</sub> (IEFPCM)

Energy: E(RB3LYP)=-650.0457425

|                                              |                             |
|----------------------------------------------|-----------------------------|
| Zero-point correction=                       | 0.177862 (Hartree/Particle) |
| Thermal correction to Energy=                | 0.189971                    |
| Thermal correction to Enthalpy=              | 0.190916                    |
| Thermal correction to Gibbs Free Energy=     | 0.138703                    |
| Sum of electronic and zero-point Energies=   | -649.867880                 |
| Sum of electronic and thermal Energies=      | -649.855771                 |
| Sum of electronic and thermal Enthalpies=    | -649.854827                 |
| Sum of electronic and thermal Free Energies= | -649.907040                 |

| Center<br>Number | Atomic<br>Number | Atomic<br>Type | Coordinates (Angstroms) |           |           |
|------------------|------------------|----------------|-------------------------|-----------|-----------|
|                  |                  |                | X                       | Y         | Z         |
| 1                | 6                | 0              | 0.163920                | -0.330342 | -0.881219 |
| 2                | 6                | 0              | -0.356897               | 1.088341  | -0.588444 |
| 3                | 1                | 0              | 0.188739                | -0.573207 | -1.944626 |
| 4                | 1                | 0              | -0.690943               | 1.636748  | -1.469851 |
| 5                | 6                | 0              | 1.906368                | 0.820623  | 0.260465  |
| 6                | 1                | 0              | 2.841673                | 1.043865  | 0.750469  |
| 7                | 6                | 0              | 1.547453                | -0.360635 | -0.263024 |
| 8                | 6                | 0              | 0.818758                | 1.808019  | 0.097335  |
| 9                | 8                | 0              | 0.830974                | 2.969374  | 0.437636  |
| 10               | 8                | 0              | -1.409352               | 0.895837  | 0.348075  |
| 11               | 8                | 0              | -0.723590               | -1.207457 | -0.189205 |
| 12               | 6                | 0              | -1.884395               | -0.452838 | 0.202942  |
| 13               | 6                | 0              | -2.955558               | -0.530278 | -0.878792 |
| 14               | 1                | 0              | -2.574299               | -0.163612 | -1.831039 |
| 15               | 1                | 0              | -3.277177               | -1.562177 | -1.010724 |
| 16               | 1                | 0              | -3.816704               | 0.072716  | -0.594815 |
| 17               | 6                | 0              | -2.356108               | -0.946123 | 1.553287  |
| 18               | 1                | 0              | -2.666692               | -1.986958 | 1.480468  |
| 19               | 1                | 0              | -1.550694               | -0.862492 | 2.279545  |
| 20               | 1                | 0              | -3.205749               | -0.354706 | 1.890146  |
| 21               | 6                | 0              | 2.383131                | -1.587678 | -0.267392 |
| 22               | 8                | 0              | 3.463010                | -1.660987 | 0.276860  |
| 23               | 1                | 0              | 1.962505                | -2.451804 | -0.805738 |

Energy, thermodynamic properties and geometry of **5c** optimized at the B3LYP-6-311++G(2d,2p) level in CH<sub>2</sub>Cl<sub>2</sub> (IEFPCM)

Energy: E(RB3LYP)=-650.0473986

|                                              |                             |
|----------------------------------------------|-----------------------------|
| Zero-point correction=                       | 0.178173 (Hartree/Particle) |
| Thermal correction to Energy=                | 0.190093                    |
| Thermal correction to Enthalpy=              | 0.191037                    |
| Thermal correction to Gibbs Free Energy=     | 0.139831                    |
| Sum of electronic and zero-point Energies=   | -649.869226                 |
| Sum of electronic and thermal Energies=      | -649.857306                 |
| Sum of electronic and thermal Enthalpies=    | -649.856362                 |
| Sum of electronic and thermal Free Energies= | -649.907567                 |

| Center Number | Atomic Number | Atomic Type | Coordinates (Angstroms) |           |           |
|---------------|---------------|-------------|-------------------------|-----------|-----------|
|               |               |             | X                       | Y         | Z         |
| 1             | 6             | 0           | -0.348911               | 0.905445  | -1.006853 |
| 2             | 6             | 0           | 0.370131                | 1.934673  | -0.104376 |
| 3             | 6             | 0           | 1.580149                | 1.275257  | 0.437048  |
| 4             | 6             | 0           | 1.625506                | -0.007354 | 0.044649  |
| 5             | 6             | 0           | 0.460449                | -0.394124 | -0.850277 |
| 6             | 8             | 0           | -1.662648               | 0.588224  | -0.591589 |
| 7             | 8             | 0           | -0.442216               | -1.318533 | -0.252036 |
| 8             | 6             | 0           | -1.637647               | -0.635217 | 0.167049  |
| 9             | 6             | 0           | -1.602692               | -0.349017 | 1.664427  |
| 10            | 6             | 0           | -2.837257               | -1.469105 | -0.238660 |
| 11            | 8             | 0           | 0.001250                | 3.066514  | 0.112667  |
| 12            | 6             | 0           | 2.712485                | -0.941019 | 0.398101  |
| 13            | 8             | 0           | 2.793365                | -2.063320 | -0.052776 |
| 14            | 1             | 0           | 3.468139                | -0.550965 | 1.099140  |
| 15            | 1             | 0           | -0.384889               | 1.286647  | -2.026411 |
| 16            | 1             | 0           | 2.294514                | 1.780348  | 1.071074  |
| 17            | 1             | 0           | 0.810396                | -0.820055 | -1.788149 |
| 18            | 1             | 0           | -1.550403               | -1.286027 | 2.217135  |
| 19            | 1             | 0           | -0.740324               | 0.256037  | 1.935153  |
| 20            | 1             | 0           | -2.505869               | 0.181791  | 1.961597  |
| 21            | 1             | 0           | -2.820341               | -2.424674 | 0.282836  |
| 22            | 1             | 0           | -3.758085               | -0.949089 | 0.020887  |
| 23            | 1             | 0           | -2.816936               | -1.647151 | -1.311671 |



Energy, thermodynamic properties and geometry of **5d** optimized at the B3LYP-6-311++G(2d,2p)level in CH<sub>2</sub>Cl<sub>2</sub> (IEFPCM)

Energy: E(RB3LYP)=-650.044841

|                                              |                             |
|----------------------------------------------|-----------------------------|
| Zero-point correction=                       | 0.177934 (Hartree/Particle) |
| Thermal correction to Energy=                | 0.190009                    |
| Thermal correction to Enthalpy=              | 0.190953                    |
| Thermal correction to Gibbs Free Energy=     | 0.138967                    |
| Sum of electronic and zero-point Energies=   | -649.866907                 |
| Sum of electronic and thermal Energies=      | -649.854832                 |
| Sum of electronic and thermal Enthalpies=    | -649.853888                 |
| Sum of electronic and thermal Free Energies= | -649.905874                 |

| Center<br>Number | Atomic<br>Number | Atomic<br>Type | Coordinates (Angstroms) |           |           |
|------------------|------------------|----------------|-------------------------|-----------|-----------|
|                  |                  |                | X                       | Y         | Z         |
| 1                | 6                | 0              | -0.422596               | 1.036932  | -0.900435 |
| 2                | 6                | 0              | 0.560554                | 1.818053  | 0.001156  |
| 3                | 6                | 0              | 1.707244                | 0.928567  | 0.283714  |
| 4                | 6                | 0              | 1.509529                | -0.275057 | -0.274108 |
| 5                | 6                | 0              | 0.214710                | -0.352471 | -1.065212 |
| 6                | 8                | 0              | -1.686565               | 0.804640  | -0.305630 |
| 7                | 8                | 0              | -0.734085               | -1.265429 | -0.523794 |
| 8                | 6                | 0              | -1.741125               | -0.539980 | 0.207155  |
| 9                | 6                | 0              | -1.454277               | -0.564731 | 1.704214  |
| 10               | 6                | 0              | -3.097120               | -1.125221 | -0.136194 |
| 11               | 8                | 0              | 0.404138                | 2.950726  | 0.399007  |
| 12               | 6                | 0              | 2.435716                | -1.431014 | -0.173197 |
| 13               | 8                | 0              | 3.441654                | -1.423431 | 0.501862  |
| 14               | 1                | 0              | 2.155860                | -2.320372 | -0.759987 |
| 15               | 1                | 0              | -0.567578               | 1.578220  | -1.834076 |
| 16               | 1                | 0              | 2.555318                | 1.223475  | 0.882881  |
| 17               | 1                | 0              | 0.397983                | -0.635662 | -2.100976 |
| 18               | 1                | 0              | -0.481947               | -0.134079 | 1.931283  |
| 19               | 1                | 0              | -2.217354               | 0.001865  | 2.235692  |
| 20               | 1                | 0              | -1.468233               | -1.592236 | 2.065190  |
| 21               | 1                | 0              | -3.152321               | -2.159901 | 0.198217  |
| 22               | 1                | 0              | -3.883543               | -0.558740 | 0.359996  |
| 23               | 1                | 0              | -3.253914               | -1.087875 | -1.212056 |

Energy, thermodynamic properties and geometry of **5a** optimized at the B3LYP-6-311++G(2d,2p) level in MeOH (IEFPCM)

Energy: E(RB3LYP)=-650.0505711

|                                              |                             |
|----------------------------------------------|-----------------------------|
| Zero-point correction=                       | 0.178246 (Hartree/Particle) |
| Thermal correction to Energy=                | 0.190141                    |
| Thermal correction to Enthalpy=              | 0.191085                    |
| Thermal correction to Gibbs Free Energy=     | 0.139869                    |
| Sum of electronic and zero-point Energies=   | -649.872325                 |
| Sum of electronic and thermal Energies=      | -649.860430                 |
| Sum of electronic and thermal Enthalpies=    | -649.859486                 |
| Sum of electronic and thermal Free Energies= | -649.910702                 |

| Center Number | Atomic Number | Atomic Type | Coordinates (Angstroms) |           |           |
|---------------|---------------|-------------|-------------------------|-----------|-----------|
|               |               |             | X                       | Y         | Z         |
| 1             | 6             | 0           | 0.347068                | -0.396036 | -0.671620 |
| 2             | 6             | 0           | -0.243913               | 1.027108  | -0.709606 |
| 3             | 1             | 0           | 0.463019                | -0.850777 | -1.655043 |
| 4             | 1             | 0           | -0.431503               | 1.400122  | -1.717339 |
| 5             | 6             | 0           | 1.921284                | 1.034924  | 0.398049  |
| 6             | 1             | 0           | 2.797046                | 1.397977  | 0.915599  |
| 7             | 6             | 0           | 1.679156                | -0.232587 | 0.030022  |
| 8             | 6             | 0           | 0.793726                | 1.909420  | 0.007089  |
| 9             | 8             | 0           | 0.690123                | 3.098028  | 0.211208  |
| 10            | 8             | 0           | -1.437036               | 0.956108  | 0.058530  |
| 11            | 8             | 0           | -0.566872               | -1.144713 | 0.129847  |
| 12            | 6             | 0           | -1.811667               | -0.430791 | 0.160784  |
| 13            | 6             | 0           | -2.691864               | -0.831231 | -1.017880 |
| 14            | 1             | 0           | -2.938913               | -1.889833 | -0.954518 |
| 15            | 1             | 0           | -3.615308               | -0.254282 | -1.005876 |
| 16            | 1             | 0           | -2.183750               | -0.650974 | -1.964380 |
| 17            | 6             | 0           | -2.469253               | -0.655852 | 1.504754  |
| 18            | 1             | 0           | -3.389006               | -0.077194 | 1.570557  |
| 19            | 1             | 0           | -2.715268               | -1.709294 | 1.626538  |
| 20            | 1             | 0           | -1.795510               | -0.350507 | 2.302408  |
| 21            | 6             | 0           | 2.618611                | -1.348841 | 0.247389  |
| 22            | 8             | 0           | 2.423542                | -2.469168 | -0.174762 |
| 23            | 1             | 0           | 3.529234                | -1.102823 | 0.816040  |

Energy, thermodynamic properties and geometry of **5b** optimized at the B3LYP-6-311++G(2d,2p) level in MeOH (IEFPCM)

Energy: E(RB3LYP)=-650.0476113

|                                              |                             |
|----------------------------------------------|-----------------------------|
| Zero-point correction=                       | 0.177882 (Hartree/Particle) |
| Thermal correction to Energy=                | 0.189985                    |
| Thermal correction to Enthalpy=              | 0.190929                    |
| Thermal correction to Gibbs Free Energy=     | 0.138715                    |
| Sum of electronic and zero-point Energies=   | -649.869730                 |
| Sum of electronic and thermal Energies=      | -649.857626                 |
| Sum of electronic and thermal Enthalpies=    | -649.856682                 |
| Sum of electronic and thermal Free Energies= | -649.908897                 |

| Center<br>Number | Atomic<br>Number | Atomic<br>Type | Coordinates (Angstroms) |           |           |
|------------------|------------------|----------------|-------------------------|-----------|-----------|
|                  |                  |                | X                       | Y         | Z         |
| 1                | 6                | 0              | 0.161414                | -0.333725 | -0.872263 |
| 2                | 6                | 0              | -0.355129               | 1.087075  | -0.582815 |
| 3                | 1                | 0              | 0.175167                | -0.584021 | -1.933877 |
| 4                | 1                | 0              | -0.676667               | 1.636238  | -1.468239 |
| 5                | 6                | 0              | 1.911593                | 0.818076  | 0.256433  |
| 6                | 1                | 0              | 2.851678                | 1.043031  | 0.736346  |
| 7                | 6                | 0              | 1.550692                | -0.362285 | -0.267982 |
| 8                | 6                | 0              | 0.818486                | 1.801142  | 0.110872  |
| 9                | 8                | 0              | 0.824018                | 2.956874  | 0.472735  |
| 10               | 8                | 0              | -1.418581               | 0.902770  | 0.343387  |
| 11               | 8                | 0              | -0.720633               | -1.203646 | -0.162877 |
| 12               | 6                | 0              | -1.888224               | -0.450217 | 0.208232  |
| 13               | 6                | 0              | -2.948930               | -0.541727 | -0.882498 |
| 14               | 1                | 0              | -2.560257               | -0.184774 | -1.835401 |
| 15               | 1                | 0              | -3.267515               | -1.575680 | -1.005333 |
| 16               | 1                | 0              | -3.814025               | 0.062112  | -0.612581 |
| 17               | 6                | 0              | -2.371041               | -0.930687 | 1.559249  |
| 18               | 1                | 0              | -2.678102               | -1.973081 | 1.494477  |
| 19               | 1                | 0              | -1.572812               | -0.837123 | 2.292333  |
| 20               | 1                | 0              | -3.226020               | -0.338937 | 1.881692  |
| 21               | 6                | 0              | 2.392748                | -1.584589 | -0.290777 |
| 22               | 8                | 0              | 3.461974                | -1.668079 | 0.273736  |
| 23               | 1                | 0              | 1.988540                | -2.434519 | -0.862491 |

Energy, thermodynamic properties and geometry of **5c** optimized at the B3LYP-6-311++G(2d,2p) level in MeOH (IEFPCM)

Energy: E(RB3LYP)=-650.0494763

|                                              |                             |
|----------------------------------------------|-----------------------------|
| Zero-point correction=                       | 0.178161 (Hartree/Particle) |
| Thermal correction to Energy=                | 0.190078                    |
| Thermal correction to Enthalpy=              | 0.191022                    |
| Thermal correction to Gibbs Free Energy=     | 0.139823                    |
| Sum of electronic and zero-point Energies=   | -649.871315                 |
| Sum of electronic and thermal Energies=      | -649.859398                 |
| Sum of electronic and thermal Enthalpies=    | -649.858454                 |
| Sum of electronic and thermal Free Energies= | -649.909653                 |

| Center Number | Atomic Number | Atomic Type | Coordinates (Angstroms) |           |           |
|---------------|---------------|-------------|-------------------------|-----------|-----------|
|               |               |             | X                       | Y         | Z         |
| 1             | 6             | 0           | -0.348256               | 0.906012  | -1.007511 |
| 2             | 6             | 0           | 0.370714                | 1.934866  | -0.105701 |
| 3             | 6             | 0           | 1.581621                | 1.277663  | 0.434285  |
| 4             | 6             | 0           | 1.625502                | -0.005815 | 0.044224  |
| 5             | 6             | 0           | 0.461103                | -0.393047 | -0.851144 |
| 6             | 8             | 0           | -1.662167               | 0.589491  | -0.589954 |
| 7             | 8             | 0           | -0.442758               | -1.318992 | -0.255473 |
| 8             | 6             | 0           | -1.637407               | -0.635941 | 0.166830  |
| 9             | 6             | 0           | -1.600373               | -0.352360 | 1.664429  |
| 10            | 6             | 0           | -2.837964               | -1.468134 | -0.239405 |
| 11            | 8             | 0           | -0.002033               | 3.065805  | 0.113391  |
| 12            | 6             | 0           | 2.710248                | -0.939757 | 0.402044  |
| 13            | 8             | 0           | 2.781542                | -2.068962 | -0.035109 |
| 14            | 1             | 0           | 3.471970                | -0.545618 | 1.093152  |
| 15            | 1             | 0           | -0.384585               | 1.286299  | -2.027264 |
| 16            | 1             | 0           | 2.296984                | 1.782927  | 1.066825  |
| 17            | 1             | 0           | 0.811750                | -0.816876 | -1.789592 |
| 18            | 1             | 0           | -1.550094               | -1.290423 | 2.215499  |
| 19            | 1             | 0           | -0.736276               | 0.249960  | 1.935656  |
| 20            | 1             | 0           | -2.502538               | 0.179237  | 1.963352  |
| 21            | 1             | 0           | -2.821390               | -2.424595 | 0.280472  |
| 22            | 1             | 0           | -3.758246               | -0.948511 | 0.022839  |
| 23            | 1             | 0           | -2.819180               | -1.643943 | -1.312880 |

Energy, thermodynamic properties and geometry of **5d** optimized at the B3LYP-6-311++G(2d,2p) level in MeOH (IEFPCM)

Energy: E(RB3LYP)=-650.046653

|                                              |                             |
|----------------------------------------------|-----------------------------|
| Zero-point correction=                       | 0.177924 (Hartree/Particle) |
| Thermal correction to Energy=                | 0.189999                    |
| Thermal correction to Enthalpy=              | 0.190944                    |
| Thermal correction to Gibbs Free Energy=     | 0.138986                    |
| Sum of electronic and zero-point Energies=   | -649.868729                 |
| Sum of electronic and thermal Energies=      | -649.856654                 |
| Sum of electronic and thermal Enthalpies=    | -649.855709                 |
| Sum of electronic and thermal Free Energies= | -649.907667                 |

| Center<br>Number | Atomic<br>Number | Atomic<br>Type | Coordinates (Angstroms) |           |           |
|------------------|------------------|----------------|-------------------------|-----------|-----------|
|                  |                  |                | X                       | Y         | Z         |
| 1                | 6                | 0              | -0.420876               | 1.034171  | -0.899904 |
| 2                | 6                | 0              | 0.559350                | 1.812620  | 0.006005  |
| 3                | 6                | 0              | 1.709088                | 0.926560  | 0.282586  |
| 4                | 6                | 0              | 1.511412                | -0.277015 | -0.275613 |
| 5                | 6                | 0              | 0.214930                | -0.355578 | -1.063647 |
| 6                | 8                | 0              | -1.687914               | 0.804206  | -0.310118 |
| 7                | 8                | 0              | -0.734320               | -1.266584 | -0.518055 |
| 8                | 6                | 0              | -1.743061               | -0.539215 | 0.208150  |
| 9                | 6                | 0              | -1.458904               | -0.557991 | 1.705707  |
| 10               | 6                | 0              | -3.098295               | -1.125727 | -0.135743 |
| 11               | 8                | 0              | 0.396576                | 2.941848  | 0.413409  |
| 12               | 6                | 0              | 2.441869                | -1.429935 | -0.180985 |
| 13               | 8                | 0              | 3.440199                | -1.426916 | 0.506177  |
| 14               | 1                | 0              | 2.173766                | -2.311755 | -0.783541 |
| 15               | 1                | 0              | -0.560071               | 1.575677  | -1.834198 |
| 16               | 1                | 0              | 2.558861                | 1.223109  | 0.878428  |
| 17               | 1                | 0              | 0.396142                | -0.640507 | -2.098930 |
| 18               | 1                | 0              | -0.486952               | -0.126490 | 1.932931  |
| 19               | 1                | 0              | -2.223568               | 0.009521  | 2.234004  |
| 20               | 1                | 0              | -1.473140               | -1.584180 | 2.070309  |
| 21               | 1                | 0              | -3.154084               | -2.159126 | 0.202448  |
| 22               | 1                | 0              | -3.885905               | -0.558159 | 0.357368  |
| 23               | 1                | 0              | -3.253054               | -1.092259 | -1.212086 |

**Single Point Energy:**

B2PLYPD/aug-cc-pVTZ//B3LYP/6-311++G(2d,2p) in MeOH (IEFPCM)

**5a:** Energy: (B2PLYPD)=-649,6174147

**5b:** Energy: (B2PLYPD)=-649,6143193

**5c:** Energy: (B2PLYPD)=-649,6170058

**5d:** Energy: (B2PLYPD)=-649,6140124

B2PLYPD/aug-cc-pVTZ//B3LYP/6-311++G(2d,2p) in DCM (IEFPCM)

**5a:** Energy: (B2PLYPD)=-649,6153791

**5b:** Energy: (B2PLYPD)=-649,6125289

**5c:** Energy: (B2PLYPD)=-649,6149982

**5d:** Energy: (B2PLYPD)=-649,6122666
